# Supplementary material for: Quantification of antibiotic residues from green edible beef offal (tripe) from abattoirs and butcheries in Gaborone, Botswana
Source: Research Square preprint supplement (doi:10.21203/rs.3.rs-7518067/v1), 2025-09-19
Supplement: Supplementary file 1 [file 0a316f595d8bde2521c961dc.xlsx]

## Sheet: Table 1
Sample Name	S1									Injection Vial							10
Sample ID										Injection Volume							5
Sample Type	Unknown									Algorithm Used							MQ4
Acquisition Date	2024/07/15 17:10:32									Dilution Factor							1
Acquisition Method	2024 ANTIMICROBIALS.dam									Weight to Volume							N/A
Project	R. Tshepho PhD\2024_05_29									Instrument Name							QTRAP 6500+ Low Mass
Data File	DataBUAN STUDENT MOGODU ANTIMICROBIALS.wiff
Result Table	BUAN STUDENT ANTIMICROMIBIALS
Sample Comment
Results Summary
Analyte Peak Name			Calculated. Concentration (µg/Kg)								Analyte Expected RT				Analyte Actual RT						Accuracy
Doxycycline T1			0.3								3.62				3.61						N/A
Ampicillin T1			< 0								4.52				4.43						N/A
Penicillin G T1			0.4								4.12				4.26						N/A
Penicillin V T1			< 0								2.78				3.22						N/A
Oxaciliin T1			0.4								4.24				4.23						N/A
Cloxacillin T1			0.6								4.27				4.29						N/A
Dicloxacillin T1			0.1								4.27				4.34						N/A
Nafcillin T1			< 0								4.47				4.44						N/A
Cefapirin T1			< 0								2.43				2.08						N/A
Cefalexin T1			0								2.78				2.76						N/A
Cefquinome T1			< 0								2.66				2.43						N/A
Danofloxacin T1			0								2.99				2.98						N/A
Difloxacin T1			0.2								3.18				3.17						N/A
Enrofloxacin T1			0.2								3.03				3.01						N/A
Flumequine T1			0.2								4.18				4.18						N/A
Ciprofloxacin T1			< 0								2.91				3.18						N/A
Marbofloxacin T1			< 0								2.78				2.77						N/A
Oxolonic acid T1			< 0								3.8				3.8						N/A
Sarafloxacin 1			< 0								4.7				4.56						N/A
Sulfamerazine T1			0.1								2.76				2.42						N/A
Sulfamethazine T1			< 0								3.01				2.99						N/A
Sulfamonomethoxine T1			0.1								3.05				2.99						N/A
Sulfapyridine T1			0.2								2.65				2.53						N/A
Sulfaquinoxaline T1			0.1								3.81				3.8						N/A
Sulfathiazole T1			0								2.55				2.82						N/A
Sulfadimethoxine T1			< 0								3.76				3.76						N/A
Sulfachloropyridazine T1			0								3.24				3.06						N/A
Sulfadiazine T1			0.2								2.43				2.54						N/A
Sulfamethoxypyridazine T1			< 0								3.03				2.86						N/A
Trimethoprim T1			< 0								2.72				2.68						N/A
Sulfisoxasole T1			0								3.45				3.45						N/A
Sulfamethizole T1			0.3								2.97				2.95						N/A
Amoxicillin T1			< 0								4.08				4.24						N/A
Erythromycin T1			0								4.06				3.91						N/A
Tilmicosin T1			0.1								3.68				3.67						N/A
Tylosin T1			< 0								4.06				4.05						N/A
Tulathromycin T1			0								2.84				2.82						N/A
Gamithromycin T1			< 0								3.53				3.52						N/A
Lincomycin T1			< 0								2.57				2.55						N/A
Pirlimycin T1			< 0								3.51				3.5						N/A
Tildipirosin T1			0.1								2.42				2.41						N/A
Sample Name	S2									Injection Vial							11
Sample ID										Injection Volume							5
Sample Type	Unknown									Algorithm Used							MQ4
Acquisition Date	2024/07/15 17:25:08									Dilution Factor							1
Acquisition Method	2024 ANTIMICROBIALS.dam									Weight to Volume							N/A
Project	R. Tshepho PhD\2024_05_29									Instrument Name							QTRAP 6500+ Low Mass
Data File	DataBUAN STUDENT MOGODU ANTIMICROBIALS.wiff
Result Table	BUAN STUDENT ANTIMICROMIBIALS
Sample Comment
Results Summary
Analyte Peak Name					Calculated. Concentration ()						Analyte Expected RT			Analyte Actual RT							Accuracy
Doxycycline T1					0.1						3.62			3.6							N/A
Ampicillin T1					< 0						4.64			4.55							N/A
Penicillin G T1					1.4						4.12			4.08							N/A
Penicillin V T1					1.2						2.78			2.8							N/A
Oxaciliin T1					0.2						4.24			4.25							N/A
Cloxacillin T1					0.6						4.27			4.53							N/A
Dicloxacillin T1					0.2						4.27			4.32							N/A
Nafcillin T1					< 0						4.47			4.45							N/A
Cefalonium T1					2.8						1.92			2.36							N/A
Cefapirin T1					0.1						2.43			2.32							N/A
Cefalexin T1					< 0						2.78			2.75							N/A
Cefquinome T1					0.2						2.66			2.95							N/A
Danofloxacin T1					0.2						2.99			2.97							N/A
Difloxacin T1					0.3						3.18			3.17							N/A
Enrofloxacin T1					< 0						3.03			3							N/A
Flumequine T1					0.2						4.18			4.18							N/A
Ciprofloxacin T1					< 0						2.91			3.18							N/A
Marbofloxacin T1					0.1						2.78			2.76							N/A
Oxolonic acid T1					< 0						3.8			3.79							N/A
Sarafloxacin 1					< 0						4.7			4.57							N/A
Sulfamerazine T1					< 0						2.76			2.75							N/A
Sulfamethazine T1					< 0						3.01			2.94							N/A
Sulfamonomethoxine T1					0.1						3.05			3.09							N/A
Sulfapyridine T1					< 0						2.65			2.41							N/A
Sulfaquinoxaline T1					< 0						3.81			3.8							N/A
Sulfathiazole T1					< 0						2.55			2.62							N/A
Sulfadimethoxine T1					< 0						3.76			3.74							N/A
Sulfachloropyridazine T1					0.1						3.24			2.9							N/A
Sulfadiazine T1					0						2.43			2.26							N/A
Sulfamethoxypyridazine T1					0						3.03			3.3							N/A
Trimethoprim T1					< 0						2.72			2.67							N/A
Sulfisoxasole T1					< 0						3.45			3.45							N/A
Sulfamethizole T1					0.1						2.97			3.37							N/A
Amoxicillin T1					< 0						4.08			4.04							N/A
Erythromycin T1					0						4.06			4.53							N/A
Tilmicosin T1					0.1						3.68			3.67							N/A
Tylosin T1					< 0						4.06			4.5							N/A
Tulathromycin T1					< 0						2.84			2.81							N/A
Gamithromycin T1					< 0						3.53			3.51							N/A
Lincomycin T1					< 0						2.57			2.55							N/A
Pirlimycin T1					< 0						3.51			3.49							N/A
Tildipirosin T1					< 0						2.42			2.41							N/A
Sample Name	S3									Injection Vial							12
Sample ID										Injection Volume							5
Sample Type	Unknown									Algorithm Used							MQ4
Acquisition Date	2024/07/15 17:39:44									Dilution Factor							1
Acquisition Method	2024 ANTIMICROBIALS.dam									Weight to Volume							N/A
Project	R. Tshepho PhD\2024_05_29									Instrument Name							QTRAP 6500+ Low Mass
Data File	DataBUAN STUDENT MOGODU ANTIMICROBIALS.wiff
Result Table	BUAN STUDENT ANTIMICROMIBIALS
Sample Comment
Results Summary
Analyte Peak Name					Calculated. Concentration ()					Analyte Expected RT						Analyte Actual RT						Accuracy
Doxycycline T1					0.1					3.62						3.61						N/A
Ampicillin T1					< 0					4.64						4.55						N/A
Penicillin G T1					0.9					4.12						4.49						N/A
Penicillin V T1					< 0					2.78						3.28						N/A
Oxaciliin T1					0.6					4.24						4.26						N/A
Cloxacillin T1					0.1					4.27						4.29						N/A
Dicloxacillin T1					0.2					4.27						4.31						N/A
Nafcillin T1					< 0					4.47						4.46						N/A
Cefalonium T1					9.1					1.92						1.55						N/A
Cefapirin T1					0					2.43						2.42						N/A
Cefalexin T1					0					2.78						2.74						N/A
Cefquinome T1					N/A					2.66						N/A						N/A
Danofloxacin T1					< 0					2.99						2.99						N/A
Difloxacin T1					< 0					3.18						3.17						N/A
Enrofloxacin T1					< 0					3.03						3.01						N/A
Flumequine T1					0.2					4.18						4.19						N/A
Ciprofloxacin T1					< 0					2.91						3.18						N/A
Marbofloxacin T1					< 0					2.78						2.75						N/A
Oxolonic acid T1					< 0					3.8						3.81						N/A
Sarafloxacin 1					< 0					4.7						4.6						N/A
Sulfamerazine T1					< 0					2.76						2.36						N/A
Sulfamethazine T1					< 0					3.01						3.01						N/A
Sulfamonomethoxine T1					0.1					3.05						2.79						N/A
Sulfapyridine T1					< 0					2.65						2.71						N/A
Sulfaquinoxaline T1					< 0					3.81						3.8						N/A
Sulfathiazole T1					< 0					2.55						2.7						N/A
Sulfadimethoxine T1					0					3.76						3.74						N/A
Sulfachloropyridazine T1					0.2					3.24						3.26						N/A
Sulfadiazine T1					< 0					2.43						2.08						N/A
Sulfamethoxypyridazine T1					0.1					3.03						3.03						N/A
Trimethoprim T1					< 0					2.72						2.69						N/A
Sulfisoxasole T1					< 0					3.45						3.45						N/A
Sulfamethizole T1					< 0					2.97						3.01						N/A
Amoxicillin T1					< 0					4.08						4.5						N/A
Erythromycin T1					0					4.06						3.95						N/A
Tilmicosin T1					0.1					3.68						3.67						N/A
Tylosin T1					0.1					4.06						4.03						N/A
Spiramycin T1					< 0					3.34						3.53						N/A
Tulathromycin T1					0					2.84						2.82						N/A
Gamithromycin T1					< 0					3.53						3.5						N/A
Lincomycin T1					< 0					2.57						2.52						N/A
Pirlimycin T1					< 0					3.51						3.49						N/A
Tildipirosin T1					< 0					2.42						2.41						N/A
Sample Name	S4									Injection Vial							13
Sample ID										Injection Volume							5
Sample Type	Unknown									Algorithm Used							MQ4
Acquisition Date	2024/07/15 17:54:23									Dilution Factor							1
Acquisition Method	2024 ANTIMICROBIALS.dam									Weight to Volume							N/A
Project	R. Tshepho PhD\2024_05_29									Instrument Name							QTRAP 6500+ Low Mass
Data File	DataBUAN STUDENT MOGODU ANTIMICROBIALS.wiff
Result Table	BUAN STUDENT ANTIMICROMIBIALS
Sample Comment
Results Summary
Analyte Peak Name					Calculated. Concentration ()				Analyte Expected RT						Analyte Actual RT					Accuracy
Doxycycline T1					0.1				3.62						3.59					N/A
Ampicillin T1					36.9				4.64						4.66					N/A									MRL =
Penicillin G T1					1.2				4.12						4.3					N/A
Penicillin V T1					< 0				2.78						3.14					N/A
Oxaciliin T1					0.2				4.24						4.25					N/A
Cloxacillin T1					0.6				4.27						4.28					N/A
Dicloxacillin T1					0.1				4.27						4.31					N/A
Nafcillin T1					< 0				4.47						4.45					N/A
Cefalonium T1					4.9				1.92						1.94					N/A
Cefapirin T1					0.1				2.43						2.31					N/A
Cefalexin T1					0				2.78						2.74					N/A
Cefquinome T1					< 0				2.66						3.03					N/A
Danofloxacin T1					0.1				2.99						2.98					N/A
Difloxacin T1					0.2				3.18						3.17					N/A
Enrofloxacin T1					0.2				3.03						3.01					N/A
Flumequine T1					0.2				4.18						4.18					N/A
Ciprofloxacin T1					0.2				2.91						3.18					N/A
Marbofloxacin T1					< 0				2.78						2.75					N/A
Oxolonic acid T1					0.1				3.8						3.79					N/A
Sarafloxacin 1					< 0				4.7						4.58					N/A
Sulfamerazine T1					0				2.76						2.8					N/A
Sulfamethazine T1					< 0				3.01						2.97					N/A
Sulfamonomethoxine T1					0				3.05						3.25					N/A
Sulfapyridine T1					0				2.65						2.63					N/A
Sulfaquinoxaline T1					< 0				3.81						3.81					N/A
Sulfathiazole T1					< 0				2.55						2.26					N/A
Sulfadimethoxine T1					< 0				3.76						3.77					N/A
Sulfachloropyridazine T1					< 0				3.24						3.16					N/A
Sulfadiazine T1					< 0				2.43						2.36					N/A
Sulfamethoxypyridazine T1					< 0				3.03						3.09					N/A
Trimethoprim T1					< 0				2.72						2.69					N/A
Sulfisoxasole T1					< 0				3.45						3.44					N/A
Sulfamethizole T1					0.1				2.97						3.34					N/A
Amoxicillin T1					< 0				4.08						4.54					N/A
Erythromycin T1					< 0				4.06						4.03					N/A
Tilmicosin T1					0				3.68						3.66					N/A
Tylosin T1					< 0				4.06						4.06					N/A
Spiramycin T1					N/A				3.34						N/A					N/A
Tulathromycin T1					0.1				2.84						2.81					N/A
Gamithromycin T1					< 0				3.53						3.51					N/A
Lincomycin T1					< 0				2.57						2.56					N/A
Pirlimycin T1					< 0				3.51						3.52					N/A
Tildipirosin T1					0.2				2.42						2.41					N/A
Sample Name	S5									Injection Vial							14
Sample ID										Injection Volume							5
Sample Type	Unknown									Algorithm Used							MQ4
Acquisition Date	2024/07/15 18:09:02									Dilution Factor							1
Acquisition Method	2024 ANTIMICROBIALS.dam									Weight to Volume							N/A
Project	R. Tshepho PhD\2024_05_29									Instrument Name							QTRAP 6500+ Low Mass
Data File	DataBUAN STUDENT MOGODU ANTIMICROBIALS.wiff
Result Table	BUAN STUDENT ANTIMICROMIBIALS
Sample Comment
Results Summary
Analyte Peak Name					Calculated. Concentration ()						Analyte Expected RT			Analyte Actual RT							Accuracy
Doxycycline T1					0.1						3.62			3.6							N/A
Ampicillin T1					< 0						4.64			4.55							N/A
Penicillin G T1					1.4						4.12			4.08							N/A
Penicillin V T1					1.2						2.78			2.8							N/A
Oxaciliin T1					0.2						4.24			4.25							N/A
Cloxacillin T1					0.6						4.27			4.53							N/A
Dicloxacillin T1					0.2						4.27			4.32							N/A
Nafcillin T1					< 0						4.47			4.45							N/A
Cefalonium T1					2.8						1.92			2.36							N/A
Cefapirin T1					0.1						2.43			2.32							N/A
Cefalexin T1					< 0						2.78			2.75							N/A
Cefquinome T1					0.2						2.66			2.95							N/A
Danofloxacin T1					0.2						2.99			2.97							N/A
Difloxacin T1					0.3						3.18			3.17							N/A
Enrofloxacin T1					< 0						3.03			3							N/A
Flumequine T1					0.2						4.18			4.18							N/A
Ciprofloxacin T1					< 0						2.91			3.18							N/A
Marbofloxacin T1					0.1						2.78			2.76							N/A
Oxolonic acid T1					< 0						3.8			3.79							N/A
Sarafloxacin 1					< 0						4.7			4.57							N/A
Sulfamerazine T1					< 0						2.76			2.75							N/A
Sulfamethazine T1					< 0						3.01			2.94							N/A
Sulfamonomethoxine T1					0.1						3.05			3.09							N/A
Sulfapyridine T1					< 0						2.65			2.41							N/A
Sulfaquinoxaline T1					< 0						3.81			3.8							N/A
Sulfathiazole T1					< 0						2.55			2.62							N/A
Sulfadimethoxine T1					< 0						3.76			3.74							N/A
Sulfachloropyridazine T1					0.1						3.24			2.9							N/A
Sulfadiazine T1					0						2.43			2.26							N/A
Sulfamethoxypyridazine T1					0						3.03			3.3							N/A
Trimethoprim T1					< 0						2.72			2.67							N/A
Sulfisoxasole T1					< 0						3.45			3.45							N/A
Sulfamethizole T1					0.1						2.97			3.37							N/A
Amoxicillin T1					< 0						4.08			4.04							N/A
Erythromycin T1					0						4.06			4.53							N/A
Tilmicosin T1					0.1						3.68			3.67							N/A
Tylosin T1					< 0						4.06			4.5							N/A
Tulathromycin T1					< 0						2.84			2.81							N/A
Gamithromycin T1					< 0						3.53			3.51							N/A
Lincomycin T1					< 0						2.57			2.55							N/A
Pirlimycin T1					< 0						3.51			3.49							N/A
Tildipirosin T1					< 0						2.42			2.41							N/A
Sample Name	S6									Injection Vial							15
Sample ID										Injection Volume							5
Sample Type	Unknown									Algorithm Used							MQ4
Acquisition Date	2024/07/15 18:23:41									Dilution Factor							1
Acquisition Method	2024 ANTIMICROBIALS.dam									Weight to Volume							N/A
Project	R. Tshepho PhD\2024_05_29									Instrument Name							QTRAP 6500+ Low Mass
Data File	DataBUAN STUDENT MOGODU ANTIMICROBIALS.wiff
Result Table	BUAN STUDENT ANTIMICROMIBIALS
Sample Comment
Results Summary
Analyte Peak Name					Calculated. Concentration ()						Analyte Expected RT			Analyte Actual RT							Accuracy
Doxycycline T1					0.1						3.62			3.6							N/A
Ampicillin T1					32.4						4.64			4.65							N/A
Penicillin G T1					1.4						4.12			4.08							N/A
Penicillin V T1					1.2						2.78			2.8							N/A
Oxaciliin T1					0.2						4.24			4.25							N/A
Cloxacillin T1					0.6						4.27			4.53							N/A
Dicloxacillin T1					0.2						4.27			4.32							N/A
Nafcillin T1					< 0						4.47			4.45							N/A
Cefalonium T1					2.8						1.92			2.36							N/A
Cefapirin T1					0.1						2.43			2.32							N/A
Cefalexin T1					< 0						2.78			2.75							N/A
Cefquinome T1					0.2						2.66			2.95							N/A
Danofloxacin T1					0.2						2.99			2.97							N/A
Difloxacin T1					0.3						3.18			3.17							N/A
Enrofloxacin T1					< 0						3.03			3							N/A
Flumequine T1					0.2						4.18			4.18							N/A
Ciprofloxacin T1					< 0						2.91			3.18							N/A
Marbofloxacin T1					0.1						2.78			2.76							N/A
Oxolonic acid T1					< 0						3.8			3.79							N/A
Sarafloxacin 1					< 0						4.7			4.57							N/A
Sulfamerazine T1					< 0						2.76			2.75							N/A
Sulfamethazine T1					< 0						3.01			2.94							N/A
Sulfamonomethoxine T1					0.1						3.05			3.09							N/A
Sulfapyridine T1					< 0						2.65			2.41							N/A
Sulfaquinoxaline T1					< 0						3.81			3.8							N/A
Sulfathiazole T1					< 0						2.55			2.62							N/A
Sulfadimethoxine T1					< 0						3.76			3.74							N/A
Sulfachloropyridazine T1					0.1						3.24			2.9							N/A
Sulfadiazine T1					0						2.43			2.26							N/A
Sulfamethoxypyridazine T1					0						3.03			3.3							N/A
Trimethoprim T1					< 0						2.72			2.67							N/A
Sulfisoxasole T1					< 0						3.45			3.45							N/A
Sulfamethizole T1					0.1						2.97			3.37							N/A
Amoxicillin T1					< 0						4.08			4.04							N/A
Erythromycin T1					0						4.06			4.53							N/A
Tilmicosin T1					0.1						3.68			3.67							N/A
Tylosin T1					< 0						4.06			4.5							N/A
Tulathromycin T1					< 0						2.84			2.81							N/A
Gamithromycin T1					< 0						3.53			3.51							N/A
Lincomycin T1					< 0						2.57			2.55							N/A
Pirlimycin T1					< 0						3.51			3.49							N/A
Tildipirosin T1					< 0						2.42			2.41							N/A
Sample Name	S7									Injection Vial							16
Sample ID										Injection Volume							5
Sample Type	Unknown									Algorithm Used							MQ4
Acquisition Date	2024/07/15 18:38:17									Dilution Factor							1
Acquisition Method	2024 ANTIMICROBIALS.dam									Weight to Volume							N/A
Project	R. Tshepho PhD\2024_05_29									Instrument Name							QTRAP 6500+ Low Mass
Data File	DataBUAN STUDENT MOGODU ANTIMICROBIALS.wiff
Result Table	BUAN STUDENT ANTIMICROMIBIALS
Sample Comment
Results Summary
Analyte Peak Name					Calculated. Concentration ()						Analyte Expected RT			Analyte Actual RT							Accuracy
Doxycycline T1					0.1						3.62			3.6							N/A
Ampicillin T1					< 0						4.64			4.55							N/A
Penicillin G T1					1.4						4.12			4.08							N/A
Penicillin V T1					1.2						2.78			2.8							N/A
Oxaciliin T1					0.2						4.24			4.25							N/A
Cloxacillin T1					0.6						4.27			4.53							N/A
Dicloxacillin T1					0.2						4.27			4.32							N/A
Nafcillin T1					< 0						4.47			4.45							N/A
Cefalonium T1					0.9						1.92			2.36							N/A
Cefapirin T1					0.1						2.43			2.32							N/A
Cefalexin T1					< 0						2.78			2.75							N/A
Cefquinome T1					0.2						2.66			2.95							N/A
Danofloxacin T1					0.2						2.99			2.97							N/A
Difloxacin T1					0.3						3.18			3.17							N/A
Enrofloxacin T1					< 0						3.03			3							N/A
Flumequine T1					0.2						4.18			4.18							N/A
Ciprofloxacin T1					< 0						2.91			3.18							N/A
Marbofloxacin T1					0.1						2.78			2.76							N/A
Oxolonic acid T1					< 0						3.8			3.79							N/A
Sarafloxacin 1					< 0						4.7			4.57							N/A
Sulfamerazine T1					< 0						2.76			2.75							N/A
Sulfamethazine T1					< 0						3.01			2.94							N/A
Sulfamonomethoxine T1					0.1						3.05			3.09							N/A
Sulfapyridine T1					< 0						2.65			2.41							N/A
Sulfaquinoxaline T1					< 0						3.81			3.8							N/A
Sulfathiazole T1					< 0						2.55			2.62							N/A
Sulfadimethoxine T1					< 0						3.76			3.74							N/A
Sulfachloropyridazine T1					0.1						3.24			2.9							N/A
Sulfadiazine T1					0						2.43			2.26							N/A
Sulfamethoxypyridazine T1					0						3.03			3.3							N/A
Trimethoprim T1					< 0						2.72			2.67							N/A
Sulfisoxasole T1					< 0						3.45			3.45							N/A
Sulfamethizole T1					0.1						2.97			3.37							N/A
Amoxicillin T1					< 0						4.08			4.04							N/A
Erythromycin T1					0						4.06			4.53							N/A
Tilmicosin T1					0.1						3.68			3.67							N/A
Tylosin T1					< 0						4.06			4.5							N/A
Tulathromycin T1					< 0						2.84			2.81							N/A
Gamithromycin T1					< 0						3.53			3.51							N/A
Lincomycin T1					< 0						2.57			2.55							N/A
Pirlimycin T1					< 0						3.51			3.49							N/A
Tildipirosin T1					< 0						2.42			2.41							N/A
Sample Name	S8									Injection Vial							17
Sample ID										Injection Volume							5
Sample Type	Unknown									Algorithm Used							MQ4
Acquisition Date	2024/07/15 18:52:53									Dilution Factor							1
Acquisition Method	2024 ANTIMICROBIALS.dam									Weight to Volume							N/A
Project	R. Tshepho PhD\2024_05_29									Instrument Name							QTRAP 6500+ Low Mass
Data File	DataBUAN STUDENT MOGODU ANTIMICROBIALS.wiff
Result Table	BUAN STUDENT ANTIMICROMIBIALS
Sample Comment
Results Summary
Analyte Peak Name					Calculated. Concentration ()						Analyte Expected RT			Analyte Actual RT							Accuracy
Doxycycline T1					0.1						3.62			3.6							N/A
Ampicillin T1					< 0						4.64			4.55							N/A
Penicillin G T1					1.4						4.12			4.08							N/A
Penicillin V T1					1.2						2.78			2.8							N/A
Oxaciliin T1					0.2						4.24			4.25							N/A
Cloxacillin T1					0.6						4.27			4.53							N/A
Dicloxacillin T1					0.2						4.27			4.32							N/A
Nafcillin T1					< 0						4.47			4.45							N/A
Cefalonium T1					2.8						1.92			2.36							N/A
Cefapirin T1					0.1						2.43			2.32							N/A
Cefalexin T1					< 0						2.78			2.75							N/A
Cefquinome T1					0.2						2.66			2.95							N/A
Danofloxacin T1					0.2						2.99			2.97							N/A
Difloxacin T1					0.3						3.18			3.17							N/A
Enrofloxacin T1					< 0						3.03			3							N/A
Flumequine T1					0.2						4.18			4.18							N/A
Ciprofloxacin T1					< 0						2.91			3.18							N/A
Marbofloxacin T1					0.1						2.78			2.76							N/A
Oxolonic acid T1					< 0						3.8			3.79							N/A
Sarafloxacin 1					< 0						4.7			4.57							N/A
Sulfamerazine T1					< 0						2.76			2.75							N/A
Sulfamethazine T1					< 0						3.01			2.94							N/A
Sulfamonomethoxine T1					0.1						3.05			3.09							N/A
Sulfapyridine T1					< 0						2.65			2.41							N/A
Sulfaquinoxaline T1					< 0						3.81			3.8							N/A
Sulfathiazole T1					< 0						2.55			2.62							N/A
Sulfadimethoxine T1					< 0						3.76			3.74							N/A
Sulfachloropyridazine T1					0.1						3.24			2.9							N/A
Sulfadiazine T1					0						2.43			2.26							N/A
Sulfamethoxypyridazine T1					0						3.03			3.3							N/A
Trimethoprim T1					< 0						2.72			2.67							N/A
Sulfisoxasole T1					< 0						3.45			3.45							N/A
Sulfamethizole T1					0.1						2.97			3.37							N/A
Amoxicillin T1					< 0						4.08			4.04							N/A
Erythromycin T1					0						4.06			4.53							N/A
Tilmicosin T1					0.1						3.68			3.67							N/A
Tylosin T1					< 0						4.06			4.5							N/A
Tulathromycin T1					< 0						2.84			2.81							N/A
Gamithromycin T1					< 0						3.53			3.51							N/A
Lincomycin T1					< 0						2.57			2.55							N/A
Pirlimycin T1					< 0						3.51			3.49							N/A
Tildipirosin T1					< 0						2.42			2.41							N/A
Sample Name	S9									Injection Vial							18
Sample ID										Injection Volume							5
Sample Type	Unknown									Algorithm Used							MQ4
Acquisition Date	2024/07/15 19:07:30									Dilution Factor							1
Acquisition Method	2024 ANTIMICROBIALS.dam									Weight to Volume							N/A
Project	R. Tshepho PhD\2024_05_29									Instrument Name							QTRAP 6500+ Low Mass
Data File	DataBUAN STUDENT MOGODU ANTIMICROBIALS.wiff
Result Table	BUAN STUDENT ANTIMICROMIBIALS
Sample Comment
Results Summary
Analyte Peak Name			Calculated. Concentration (µg/Kg)								Analyte Expected RT				Analyte Actual RT						Accuracy
Doxycycline T1			0.3								3.62				3.61						N/A
Ampicillin T1			< 0								4.52				4.43						N/A
Penicillin G T1			0.4								4.12				4.26						N/A
Penicillin V T1			< 0								2.78				3.22						N/A
Oxaciliin T1			0.4								4.24				4.23						N/A
Cloxacillin T1			0.6								4.27				4.29						N/A
Dicloxacillin T1			0.1								4.27				4.34						N/A
Nafcillin T1			< 0								4.47				4.44						N/A
Cefapirin T1			< 0								2.43				2.08						N/A
Cefalexin T1			0								2.78				2.76						N/A
Cefquinome T1			< 0								2.66				2.43						N/A
Danofloxacin T1			0								2.99				2.98						N/A
Difloxacin T1			0.2								3.18				3.17						N/A
Enrofloxacin T1			0.2								3.03				3.01						N/A
Flumequine T1			0.2								4.18				4.18						N/A
Ciprofloxacin T1			< 0								2.91				3.18						N/A
Marbofloxacin T1			< 0								2.78				2.77						N/A
Oxolonic acid T1			< 0								3.8				3.8						N/A
Sarafloxacin 1			< 0								4.7				4.56						N/A
Sulfamerazine T1			0.1								2.76				2.42						N/A
Sulfamethazine T1			< 0								3.01				2.99						N/A
Sulfamonomethoxine T1			0.1								3.05				2.99						N/A
Sulfapyridine T1			0.2								2.65				2.53						N/A
Sulfaquinoxaline T1			0.1								3.81				3.8						N/A
Sulfathiazole T1			0								2.55				2.82						N/A
Sulfadimethoxine T1			< 0								3.76				3.76						N/A
Sulfachloropyridazine T1			0								3.24				3.06						N/A
Sulfadiazine T1			0.2								2.43				2.54						N/A
Sulfamethoxypyridazine T1			< 0								3.03				2.86						N/A
Trimethoprim T1			< 0								2.72				2.68						N/A
Sulfisoxasole T1			0								3.45				3.45						N/A
Sulfamethizole T1			0.3								2.97				2.95						N/A
Amoxicillin T1			< 0								4.08				4.24						N/A
Erythromycin T1			0								4.06				3.91						N/A
Tilmicosin T1			0.1								3.68				3.67						N/A
Tylosin T1			< 0								4.06				4.05						N/A
Tulathromycin T1			0								2.84				2.82						N/A
Gamithromycin T1			< 0								3.53				3.52						N/A
Lincomycin T1			< 0								2.57				2.55						N/A
Pirlimycin T1			< 0								3.51				3.5						N/A
Tildipirosin T1			0.1								2.42				2.41						N/A
Sample Name	S10									Injection Vial							19
Sample ID										Injection Volume							5
Sample Type	Unknown									Algorithm Used							MQ4
Acquisition Date	2024/07/15 19:22:06									Dilution Factor							1
Acquisition Method	2024 ANTIMICROBIALS.dam									Weight to Volume							N/A
Project	R. Tshepho PhD\2024_05_29									Instrument Name							QTRAP 6500+ Low Mass
Data File	DataBUAN STUDENT MOGODU ANTIMICROBIALS.wiff
Result Table	BUAN STUDENT ANTIMICROMIBIALS
Sample Comment
Results Summary
Analyte Peak Name			Calculated. Concentration (µg/Kg)								Analyte Expected RT				Analyte Actual RT						Accuracy
Doxycycline T1			0.3								3.62				3.61						N/A
Ampicillin T1			< 0								4.52				4.43						N/A
Penicillin G T1			0.4								4.12				4.26						N/A
Penicillin V T1			< 0								2.78				3.22						N/A
Oxaciliin T1			0.4								4.24				4.23						N/A
Cloxacillin T1			0.6								4.27				4.29						N/A
Dicloxacillin T1			0.1								4.27				4.34						N/A
Nafcillin T1			< 0								4.47				4.44						N/A
Cefapirin T1			< 0								2.43				2.08						N/A
Cefalexin T1			0								2.78				2.76						N/A
Cefquinome T1			< 0								2.66				2.43						N/A
Danofloxacin T1			0								2.99				2.98						N/A
Difloxacin T1			0.2								3.18				3.17						N/A
Enrofloxacin T1			0.2								3.03				3.01						N/A
Flumequine T1			0.2								4.18				4.18						N/A
Ciprofloxacin T1			< 0								2.91				3.18						N/A
Marbofloxacin T1			< 0								2.78				2.77						N/A
Oxolonic acid T1			< 0								3.8				3.8						N/A
Sarafloxacin 1			< 0								4.7				4.56						N/A
Sulfamerazine T1			0.1								2.76				2.42						N/A
Sulfamethazine T1			< 0								3.01				2.99						N/A
Sulfamonomethoxine T1			0.1								3.05				2.99						N/A
Sulfapyridine T1			0.2								2.65				2.53						N/A
Sulfaquinoxaline T1			0.1								3.81				3.8						N/A
Sulfathiazole T1			0								2.55				2.82						N/A
Sulfadimethoxine T1			< 0								3.76				3.76						N/A
Sulfachloropyridazine T1			0								3.24				3.06						N/A
Sulfadiazine T1			0.2								2.43				2.54						N/A
Sulfamethoxypyridazine T1			< 0								3.03				2.86						N/A
Trimethoprim T1			< 0								2.72				2.68						N/A
Sulfisoxasole T1			0								3.45				3.45						N/A
Sulfamethizole T1			0.3								2.97				2.95						N/A
Amoxicillin T1			< 0								4.08				4.24						N/A
Erythromycin T1			0								4.06				3.91						N/A
Tilmicosin T1			0.1								3.68				3.67						N/A
Tylosin T1			< 0								4.06				4.05						N/A
Tulathromycin T1			0								2.84				2.82						N/A
Gamithromycin T1			< 0								3.53				3.52						N/A
Lincomycin T1			< 0								2.57				2.55						N/A
Pirlimycin T1			< 0								3.51				3.5						N/A
Tildipirosin T1			0.1								2.42				2.41						N/A
Sample Name	S11									Injection Vial							20
Sample ID										Injection Volume							5
Sample Type	Unknown									Algorithm Used							MQ4
Acquisition Date	2024/07/15 19:51:18									Dilution Factor							1
Acquisition Method	2024 ANTIMICROBIALS.dam									Weight to Volume							N/A
Project	R. Tshepho PhD\2024_05_29									Instrument Name							QTRAP 6500+ Low Mass
Data File	DataBUAN STUDENT MOGODU ANTIMICROBIALS.wiff
Result Table	BUAN STUDENT ANTIMICROMIBIALS
Sample Comment
Results Summary
Analyte Peak Name			Calculated. Concentration (µg/Kg)								Analyte Expected RT				Analyte Actual RT						Accuracy
Doxycycline T1			0.3								3.62				3.61						N/A
Ampicillin T1			< 0								4.52				4.43						N/A
Penicillin G T1			0.4								4.12				4.26						N/A
Penicillin V T1			< 0								2.78				3.22						N/A
Oxaciliin T1			0.4								4.24				4.23						N/A
Cloxacillin T1			0.6								4.27				4.29						N/A
Dicloxacillin T1			0.1								4.27				4.34						N/A
Nafcillin T1			< 0								4.47				4.44						N/A
Cefapirin T1			< 0								2.43				2.08						N/A
Cefalexin T1			0								2.78				2.76						N/A
Cefquinome T1			< 0								2.66				2.43						N/A
Danofloxacin T1			0								2.99				2.98						N/A
Difloxacin T1			0.2								3.18				3.17						N/A
Enrofloxacin T1			0.2								3.03				3.01						N/A
Flumequine T1			0.2								4.18				4.18						N/A
Ciprofloxacin T1			< 0								2.91				3.18						N/A
Marbofloxacin T1			< 0								2.78				2.77						N/A
Oxolonic acid T1			< 0								3.8				3.8						N/A
Sarafloxacin 1			< 0								4.7				4.56						N/A
Sulfamerazine T1			0.1								2.76				2.42						N/A
Sulfamethazine T1			< 0								3.01				2.99						N/A
Sulfamonomethoxine T1			0.1								3.05				2.99						N/A
Sulfapyridine T1			0.2								2.65				2.53						N/A
Sulfaquinoxaline T1			0.1								3.81				3.8						N/A
Sulfathiazole T1			0								2.55				2.82						N/A
Sulfadimethoxine T1			< 0								3.76				3.76						N/A
Sulfachloropyridazine T1			0								3.24				3.06						N/A
Sulfadiazine T1			0.2								2.43				2.54						N/A
Sulfamethoxypyridazine T1			< 0								3.03				2.86						N/A
Trimethoprim T1			< 0								2.72				2.68						N/A
Sulfisoxasole T1			0								3.45				3.45						N/A
Sulfamethizole T1			0.3								2.97				2.95						N/A
Amoxicillin T1			< 0								4.08				4.24						N/A
Erythromycin T1			0								4.06				3.91						N/A
Tilmicosin T1			0.1								3.68				3.67						N/A
Tylosin T1			< 0								4.06				4.05						N/A
Tulathromycin T1			0								2.84				2.82						N/A
Gamithromycin T1			< 0								3.53				3.52						N/A
Lincomycin T1			< 0								2.57				2.55						N/A
Pirlimycin T1			< 0								3.51				3.5						N/A
Tildipirosin T1			0.1								2.42				2.41						N/A
Sample Name	S12									Injection Vial							21
Sample ID										Injection Volume							5
Sample Type	Unknown									Algorithm Used							MQ4
Acquisition Date	2024/07/15 20:05:54									Dilution Factor							1
Acquisition Method	2024 ANTIMICROBIALS.dam									Weight to Volume							N/A
Project	R. Tshepho PhD\2024_05_29									Instrument Name							QTRAP 6500+ Low Mass
Data File	DataBUAN STUDENT MOGODU ANTIMICROBIALS.wiff
Result Table	BUAN STUDENT ANTIMICROMIBIALS
Sample Comment
Analyte Peak Name			Calculated. Concentration (µg/Kg)								Analyte Expected RT				Analyte Actual RT						Accuracy
Doxycycline T1			0.3								3.62				3.61						N/A
Ampicillin T1			< 0								4.52				4.43						N/A
Penicillin G T1			0.4								4.12				4.26						N/A
Penicillin V T1			< 0								2.78				3.22						N/A
Oxaciliin T1			0.4								4.24				4.23						N/A
Cloxacillin T1			0.6								4.27				4.29						N/A
Dicloxacillin T1			0.1								4.27				4.34						N/A
Nafcillin T1			< 0								4.47				4.44						N/A
Cefapirin T1			< 0								2.43				2.08						N/A
Cefalexin T1			0								2.78				2.76						N/A
Cefquinome T1			< 0								2.66				2.43						N/A
Danofloxacin T1			0								2.99				2.98						N/A
Difloxacin T1			0.2								3.18				3.17						N/A
Enrofloxacin T1			0.2								3.03				3.01						N/A
Flumequine T1			0.2								4.18				4.18						N/A
Ciprofloxacin T1			< 0								2.91				3.18						N/A
Marbofloxacin T1			< 0								2.78				2.77						N/A
Oxolonic acid T1			< 0								3.8				3.8						N/A
Sarafloxacin 1			< 0								4.7				4.56						N/A
Sulfamerazine T1			0.1								2.76				2.42						N/A
Sulfamethazine T1			< 0								3.01				2.99						N/A
Sulfamonomethoxine T1			0.1								3.05				2.99						N/A
Sulfapyridine T1			0.2								2.65				2.53						N/A
Sulfaquinoxaline T1			0.1								3.81				3.8						N/A
Sulfathiazole T1			0								2.55				2.82						N/A
Sulfadimethoxine T1			< 0								3.76				3.76						N/A
Sulfachloropyridazine T1			0								3.24				3.06						N/A
Sulfadiazine T1			0.2								2.43				2.54						N/A
Sulfamethoxypyridazine T1			< 0								3.03				2.86						N/A
Trimethoprim T1			< 0								2.72				2.68						N/A
Sulfisoxasole T1			0								3.45				3.45						N/A
Sulfamethizole T1			0.3								2.97				2.95						N/A
Amoxicillin T1			< 0								4.08				4.24						N/A
Erythromycin T1			0								4.06				3.91						N/A
Tilmicosin T1			0.1								3.68				3.67						N/A
Tylosin T1			< 0								4.06				4.05						N/A
Tulathromycin T1			0								2.84				2.82						N/A
Gamithromycin T1			< 0								3.53				3.52						N/A
Lincomycin T1			< 0								2.57				2.55						N/A
Pirlimycin T1			< 0								3.51				3.5						N/A
Tildipirosin T1			0.1								2.42				2.41						N/A
Sample Name	S13									Injection Vial							22
Sample ID										Injection Volume							5
Sample Type	Unknown									Algorithm Used							MQ4
Acquisition Date	2024/07/15 20:20:33									Dilution Factor							1
Acquisition Method	2024 ANTIMICROBIALS.dam									Weight to Volume							N/A
Project	R. Tshepho PhD\2024_05_29									Instrument Name							QTRAP 6500+ Low Mass
Data File	DataBUAN STUDENT MOGODU ANTIMICROBIALS.wiff
Result Table	BUAN STUDENT ANTIMICROMIBIALS
Sample Comment
Analyte Peak Name			Calculated. Concentration (µg/Kg)								Analyte Expected RT				Analyte Actual RT						Accuracy
Doxycycline T1			0.3								3.62				3.61						N/A
Ampicillin T1			< 0								4.52				4.43						N/A
Penicillin G T1			0.4								4.12				4.26						N/A
Penicillin V T1			< 0								2.78				3.22						N/A
Oxaciliin T1			0.4								4.24				4.23						N/A
Cloxacillin T1			0.6								4.27				4.29						N/A
Dicloxacillin T1			0.1								4.27				4.34						N/A
Nafcillin T1			< 0								4.47				4.44						N/A
Cefapirin T1			< 0								2.43				2.08						N/A
Cefalexin T1			0								2.78				2.76						N/A
Cefquinome T1			< 0								2.66				2.43						N/A
Danofloxacin T1			0								2.99				2.98						N/A
Difloxacin T1			0.2								3.18				3.17						N/A
Enrofloxacin T1			17								3.03				3.01						N/A								MRL = 100 μg/kg
Flumequine T1			0.2								4.18				4.18						N/A
Ciprofloxacin T1			< 0								2.91				3.18						N/A
Marbofloxacin T1			< 0								2.78				2.77						N/A
Oxolonic acid T1			< 0								3.8				3.8						N/A
Sarafloxacin 1			< 0								4.7				4.56						N/A
Sulfamerazine T1			0.1								2.76				2.42						N/A
Sulfamethazine T1			< 0								3.01				2.99						N/A
Sulfamonomethoxine T1			0.1								3.05				2.99						N/A
Sulfapyridine T1			0.2								2.65				2.53						N/A
Sulfaquinoxaline T1			0.1								3.81				3.8						N/A
Sulfathiazole T1			0								2.55				2.82						N/A
Sulfadimethoxine T1			< 0								3.76				3.76						N/A
Sulfachloropyridazine T1			0								3.24				3.06						N/A
Sulfadiazine T1			0.2								2.43				2.54						N/A
Sulfamethoxypyridazine T1			< 0								3.03				2.86						N/A
Trimethoprim T1			< 0								2.72				2.68						N/A
Sulfisoxasole T1			0								3.45				3.45						N/A
Sulfamethizole T1			0.3								2.97				2.95						N/A
Amoxicillin T1			< 0								4.08				4.24						N/A
Erythromycin T1			0								4.06				3.91						N/A
Tilmicosin T1			0.1								3.68				3.67						N/A
Tylosin T1			< 0								4.06				4.05						N/A
Tulathromycin T1			0								2.84				2.82						N/A
Gamithromycin T1			< 0								3.53				3.52						N/A
Lincomycin T1			< 0								2.57				2.55						N/A
Pirlimycin T1			< 0								3.51				3.5						N/A
Tildipirosin T1			0.1								2.42				2.41						N/A
Sample Name	S14									Injection Vial							23
Sample ID										Injection Volume							5
Sample Type	Unknown									Algorithm Used							MQ4
Acquisition Date	2024/07/15 20:35:09									Dilution Factor							1
Acquisition Method	2024 ANTIMICROBIALS.dam									Weight to Volume							N/A
Project	R. Tshepho PhD\2024_05_29									Instrument Name							QTRAP 6500+ Low Mass
Data File	DataBUAN STUDENT MOGODU ANTIMICROBIALS.wiff
Result Table	BUAN STUDENT ANTIMICROMIBIALS
Sample Comment
Analyte Peak Name					Calculated. Concentration ()						Analyte Expected RT			Analyte Actual RT							Accuracy
Doxycycline T1					0.1						3.62			3.6							N/A
Ampicillin T1					< 0						4.64			4.55							N/A
Penicillin G T1					1.4						4.12			4.08							N/A
Penicillin V T1					1.2						2.78			2.8							N/A
Oxaciliin T1					0.2						4.24			4.25							N/A
Cloxacillin T1					0.6						4.27			4.53							N/A
Dicloxacillin T1					0.2						4.27			4.32							N/A
Nafcillin T1					< 0						4.47			4.45							N/A
Cefalonium T1					2.8						1.92			2.36							N/A
Cefapirin T1					0.1						2.43			2.32							N/A
Cefalexin T1					< 0						2.78			2.75							N/A
Cefquinome T1					0.2						2.66			2.95							N/A
Danofloxacin T1					0.2						2.99			2.97							N/A
Difloxacin T1					0.3						3.18			3.17							N/A
Enrofloxacin T1					< 0						3.03			3							N/A
Flumequine T1					0.2						4.18			4.18							N/A
Ciprofloxacin T1					< 0						2.91			3.18							N/A
Marbofloxacin T1					0.1						2.78			2.76							N/A
Oxolonic acid T1					< 0						3.8			3.79							N/A
Sarafloxacin 1					< 0						4.7			4.57							N/A
Sulfamerazine T1					< 0						2.76			2.75							N/A
Sulfamethazine T1					< 0						3.01			2.94							N/A
Sulfamonomethoxine T1					0.1						3.05			3.09							N/A
Sulfapyridine T1					< 0						2.65			2.41							N/A
Sulfaquinoxaline T1					< 0						3.81			3.8							N/A
Sulfathiazole T1					< 0						2.55			2.62							N/A
Sulfadimethoxine T1					< 0						3.76			3.74							N/A
Sulfachloropyridazine T1					0.1						3.24			2.9							N/A
Sulfadiazine T1					0						2.43			2.26							N/A
Sulfamethoxypyridazine T1					0						3.03			3.3							N/A
Trimethoprim T1					< 0						2.72			2.67							N/A
Sulfisoxasole T1					< 0						3.45			3.45							N/A
Sulfamethizole T1					0.1						2.97			3.37							N/A
Amoxicillin T1					< 0						4.08			4.04							N/A
Erythromycin T1					0						4.06			4.53							N/A
Tilmicosin T1					0.1						3.68			3.67							N/A
Tylosin T1					< 0						4.06			4.5							N/A
Tulathromycin T1					< 0						2.84			2.81							N/A
Gamithromycin T1					< 0						3.53			3.51							N/A
Lincomycin T1					< 0						2.57			2.55							N/A
Pirlimycin T1					< 0						3.51			3.49							N/A
Tildipirosin T1					< 0						2.42			2.41							N/A
Sample Name	S15									Injection Vial							24
Sample ID										Injection Volume							5
Sample Type	Unknown									Algorithm Used							MQ4
Acquisition Date	2024/07/15 20:49:45									Dilution Factor							1
Acquisition Method	2024 ANTIMICROBIALS.dam									Weight to Volume							N/A
Project	R. Tshepho PhD\2024_05_29									Instrument Name							QTRAP 6500+ Low Mass
Data File	DataBUAN STUDENT MOGODU ANTIMICROBIALS.wiff
Result Table	BUAN STUDENT ANTIMICROMIBIALS
Sample Comment
Results Summary
Analyte Peak Name					Calculated. Concentration ()						Analyte Expected RT			Analyte Actual RT							Accuracy
Doxycycline T1					0.1						3.62			3.6							N/A
Ampicillin T1					< 0						4.64			4.55							N/A
Penicillin G T1					1.4						4.12			4.08							N/A
Penicillin V T1					1.2						2.78			2.8							N/A
Oxaciliin T1					0.2						4.24			4.25							N/A
Cloxacillin T1					0.6						4.27			4.53							N/A
Dicloxacillin T1					0.2						4.27			4.32							N/A
Nafcillin T1					< 0						4.47			4.45							N/A
Cefalonium T1					2.8						1.92			2.36							N/A
Cefapirin T1					0.1						2.43			2.32							N/A
Cefalexin T1					< 0						2.78			2.75							N/A
Cefquinome T1					0.2						2.66			2.95							N/A
Danofloxacin T1					0.2						2.99			2.97							N/A
Difloxacin T1					0.3						3.18			3.17							N/A
Enrofloxacin T1					< 0						3.03			3							N/A
Flumequine T1					0.2						4.18			4.18							N/A
Ciprofloxacin T1					< 0						2.91			3.18							N/A
Marbofloxacin T1					0.1						2.78			2.76							N/A
Oxolonic acid T1					< 0						3.8			3.79							N/A
Sarafloxacin 1					< 0						4.7			4.57							N/A
Sulfamerazine T1					< 0						2.76			2.75							N/A
Sulfamethazine T1					< 0						3.01			2.94							N/A
Sulfamonomethoxine T1					0.1						3.05			3.09							N/A
Sulfapyridine T1					< 0						2.65			2.41							N/A
Sulfaquinoxaline T1					< 0						3.81			3.8							N/A
Sulfathiazole T1					< 0						2.55			2.62							N/A
Sulfadimethoxine T1					< 0						3.76			3.74							N/A
Sulfachloropyridazine T1					0.1						3.24			2.9							N/A
Sulfadiazine T1					0						2.43			2.26							N/A
Sulfamethoxypyridazine T1					0						3.03			3.3							N/A
Trimethoprim T1					< 0						2.72			2.67							N/A
Sulfisoxasole T1					< 0						3.45			3.45							N/A
Sulfamethizole T1					0.1						2.97			3.37							N/A
Amoxicillin T1					< 0						4.08			4.04							N/A
Erythromycin T1					0						4.06			4.53							N/A
Tilmicosin T1					0.1						3.68			3.67							N/A
Tylosin T1					< 0						4.06			4.5							N/A
Tulathromycin T1					< 0						2.84			2.81							N/A
Gamithromycin T1					< 0						3.53			3.51							N/A
Lincomycin T1					< 0						2.57			2.55							N/A
Pirlimycin T1					< 0						3.51			3.49							N/A
Tildipirosin T1					< 0						2.42			2.41							N/A
Sample Name	S16									Injection Vial							25
Sample ID										Injection Volume							5
Sample Type	Unknown									Algorithm Used							MQ4
Acquisition Date	2024/07/15 21:04:21									Dilution Factor							1
Acquisition Method	2024 ANTIMICROBIALS.dam									Weight to Volume							N/A
Project	R. Tshepho PhD\2024_05_29									Instrument Name							QTRAP 6500+ Low Mass
Data File	DataBUAN STUDENT MOGODU ANTIMICROBIALS.wiff
Result Table	BUAN STUDENT ANTIMICROMIBIALS
Sample Comment
Results Summary
Analyte Peak Name					Calculated. Concentration ()						Analyte Expected RT			Analyte Actual RT							Accuracy
Doxycycline T1					0.1						3.62			3.6							N/A
Ampicillin T1					< 0						4.64			4.55							N/A
Penicillin G T1					1.4						4.12			4.08							N/A
Penicillin V T1					1.2						2.78			2.8							N/A
Oxaciliin T1					0.2						4.24			4.25							N/A
Cloxacillin T1					0.6						4.27			4.53							N/A
Dicloxacillin T1					0.2						4.27			4.32							N/A
Nafcillin T1					< 0						4.47			4.45							N/A
Cefalonium T1					2.8						1.92			2.36							N/A
Cefapirin T1					0.1						2.43			2.32							N/A
Cefalexin T1					< 0						2.78			2.75							N/A
Cefquinome T1					0.2						2.66			2.95							N/A
Danofloxacin T1					0.2						2.99			2.97							N/A
Difloxacin T1					0.3						3.18			3.17							N/A
Enrofloxacin T1					< 0						3.03			3							N/A
Flumequine T1					0.2						4.18			4.18							N/A
Ciprofloxacin T1					< 0						2.91			3.18							N/A
Marbofloxacin T1					0.1						2.78			2.76							N/A
Oxolonic acid T1					< 0						3.8			3.79							N/A
Sarafloxacin 1					< 0						4.7			4.57							N/A
Sulfamerazine T1					< 0						2.76			2.75							N/A
Sulfamethazine T1					< 0						3.01			2.94							N/A
Sulfamonomethoxine T1					0.1						3.05			3.09							N/A
Sulfapyridine T1					< 0						2.65			2.41							N/A
Sulfaquinoxaline T1					< 0						3.81			3.8							N/A
Sulfathiazole T1					< 0						2.55			2.62							N/A
Sulfadimethoxine T1					< 0						3.76			3.74							N/A
Sulfachloropyridazine T1					0.1						3.24			2.9							N/A
Sulfadiazine T1					0						2.43			2.26							N/A
Sulfamethoxypyridazine T1					0						3.03			3.3							N/A
Trimethoprim T1					< 0						2.72			2.67							N/A
Sulfisoxasole T1					< 0						3.45			3.45							N/A
Sulfamethizole T1					0.1						2.97			3.37							N/A
Amoxicillin T1					< 0						4.08			4.04							N/A
Erythromycin T1					0						4.06			4.53							N/A
Tilmicosin T1					0.1						3.68			3.67							N/A
Tylosin T1					< 0						4.06			4.5							N/A
Tulathromycin T1					< 0						2.84			2.81							N/A
Gamithromycin T1					< 0						3.53			3.51							N/A
Lincomycin T1					< 0						2.57			2.55							N/A
Pirlimycin T1					< 0						3.51			3.49							N/A
Tildipirosin T1					< 0						2.42			2.41							N/A
Sample Name	S17									Injection Vial							26
Sample ID										Injection Volume							5
Sample Type	Unknown									Algorithm Used							MQ4
Acquisition Date	2024/07/15 21:18:57									Dilution Factor							1
Acquisition Method	2024 ANTIMICROBIALS.dam									Weight to Volume							N/A
Project	R. Tshepho PhD\2024_05_29									Instrument Name							QTRAP 6500+ Low Mass
Data File	DataBUAN STUDENT MOGODU ANTIMICROBIALS.wiff
Result Table	BUAN STUDENT ANTIMICROMIBIALS
Sample Comment
Results Summary
Analyte Peak Name					Calculated. Concentration ()						Analyte Expected RT			Analyte Actual RT							Accuracy
Doxycycline T1					0.1						3.62			3.6							N/A
Ampicillin T1					< 0						4.64			4.55							N/A
Penicillin G T1					1.4						4.12			4.08							N/A
Penicillin V T1					1.2						2.78			2.8							N/A
Oxaciliin T1					0.2						4.24			4.25							N/A
Cloxacillin T1					0.6						4.27			4.53							N/A
Dicloxacillin T1					0.2						4.27			4.32							N/A
Nafcillin T1					< 0						4.47			4.45							N/A
Cefalonium T1					2.8						1.92			2.36							N/A
Cefapirin T1					0.1						2.43			2.32							N/A
Cefalexin T1					< 0						2.78			2.75							N/A
Cefquinome T1					0.2						2.66			2.95							N/A
Danofloxacin T1					0.2						2.99			2.97							N/A
Difloxacin T1					0.3						3.18			3.17							N/A
Enrofloxacin T1					24.7						3.03			3.01							N/A								MRL = 100 μg/kg
Flumequine T1					0.2						4.18			4.18							N/A
Ciprofloxacin T1					< 0						2.91			3.18							N/A
Marbofloxacin T1					0.1						2.78			2.76							N/A
Oxolonic acid T1					< 0						3.8			3.79							N/A
Sarafloxacin 1					< 0						4.7			4.57							N/A
Sulfamerazine T1					< 0						2.76			2.75							N/A
Sulfamethazine T1					< 0						3.01			2.94							N/A
Sulfamonomethoxine T1					0.1						3.05			3.09							N/A
Sulfapyridine T1					< 0						2.65			2.41							N/A
Sulfaquinoxaline T1					< 0						3.81			3.8							N/A
Sulfathiazole T1					< 0						2.55			2.62							N/A
Sulfadimethoxine T1					< 0						3.76			3.74							N/A
Sulfachloropyridazine T1					0.1						3.24			2.9							N/A
Sulfadiazine T1					0						2.43			2.26							N/A
Sulfamethoxypyridazine T1					0						3.03			3.3							N/A
Trimethoprim T1					< 0						2.72			2.67							N/A
Sulfisoxasole T1					< 0						3.45			3.45							N/A
Sulfamethizole T1					0.1						2.97			3.37							N/A
Amoxicillin T1					< 0						4.08			4.04							N/A
Erythromycin T1					0						4.06			4.53							N/A
Tilmicosin T1					0.1						3.68			3.67							N/A
Tylosin T1					< 0						4.06			4.5							N/A
Tulathromycin T1					< 0						2.84			2.81							N/A
Gamithromycin T1					< 0						3.53			3.51							N/A
Lincomycin T1					< 0						2.57			2.55							N/A
Pirlimycin T1					< 0						3.51			3.49							N/A
Tildipirosin T1					< 0						2.42			2.41							N/A
Sample Name	S18									Injection Vial							27
Sample ID										Injection Volume							5
Sample Type	Unknown									Algorithm Used							MQ4
Acquisition Date	2024/07/15 21:33:33									Dilution Factor							1
Acquisition Method	2024 ANTIMICROBIALS.dam									Weight to Volume							N/A
Project	R. Tshepho PhD\2024_05_29									Instrument Name							QTRAP 6500+ Low Mass
Data File	DataBUAN STUDENT MOGODU ANTIMICROBIALS.wiff
Result Table	BUAN STUDENT ANTIMICROMIBIALS
Sample Comment
Results Summary
Analyte Peak Name			Calculated. Concentration (µg/Kg)								Analyte Expected RT				Analyte Actual RT						Accuracy
Doxycycline T1			0.3								3.62				3.61						N/A
Ampicillin T1			< 0								4.52				4.43						N/A
Penicillin G T1			0.4								4.12				4.26						N/A
Penicillin V T1			< 0								2.78				3.22						N/A
Oxaciliin T1			0.4								4.24				4.23						N/A
Cloxacillin T1			0.6								4.27				4.29						N/A
Dicloxacillin T1			0.1								4.27				4.34						N/A
Nafcillin T1			< 0								4.47				4.44						N/A
Cefapirin T1			< 0								2.43				2.08						N/A
Cefalexin T1			0								2.78				2.76						N/A
Cefquinome T1			< 0								2.66				2.43						N/A
Danofloxacin T1			0								2.99				2.98						N/A
Difloxacin T1			0.2								3.18				3.17						N/A
Enrofloxacin T1			0.1								3.03				3.01						N/A
Flumequine T1			0.2								4.18				4.18						N/A
Ciprofloxacin T1			< 0								2.91				3.18						N/A
Marbofloxacin T1			< 0								2.78				2.77						N/A
Oxolonic acid T1			< 0								3.8				3.8						N/A
Sarafloxacin 1			< 0								4.7				4.56						N/A
Sulfamerazine T1			0.1								2.76				2.42						N/A
Sulfamethazine T1			< 0								3.01				2.99						N/A
Sulfamonomethoxine T1			0.1								3.05				2.99						N/A
Sulfapyridine T1			0.2								2.65				2.53						N/A
Sulfaquinoxaline T1			0.1								3.81				3.8						N/A
Sulfathiazole T1			0								2.55				2.82						N/A
Sulfadimethoxine T1			< 0								3.76				3.76						N/A
Sulfachloropyridazine T1			0								3.24				3.06						N/A
Sulfadiazine T1			0.2								2.43				2.54						N/A
Sulfamethoxypyridazine T1			< 0								3.03				2.86						N/A
Trimethoprim T1			< 0								2.72				2.68						N/A
Sulfisoxasole T1			0								3.45				3.45						N/A
Sulfamethizole T1			0.3								2.97				2.95						N/A
Amoxicillin T1			< 0								4.08				4.24						N/A
Erythromycin T1			0								4.06				3.91						N/A
Tilmicosin T1			0.1								3.68				3.67						N/A
Tylosin T1			< 0								4.06				4.05						N/A
Tulathromycin T1			0								2.84				2.82						N/A
Gamithromycin T1			< 0								3.53				3.52						N/A
Lincomycin T1			< 0								2.57				2.55						N/A
Pirlimycin T1			< 0								3.51				3.5						N/A
Tildipirosin T1			0.1								2.42				2.41						N/A
Sample Name	S19									Injection Vial							28
Sample ID										Injection Volume							5
Sample Type	Unknown									Algorithm Used							MQ4
Acquisition Date	2024/07/15 21:48:12									Dilution Factor							1
Acquisition Method	2024 ANTIMICROBIALS.dam									Weight to Volume							N/A
Project	R. Tshepho PhD\2024_05_29									Instrument Name							QTRAP 6500+ Low Mass
Data File	DataBUAN STUDENT MOGODU ANTIMICROBIALS.wiff
Result Table	BUAN STUDENT ANTIMICROMIBIALS
Sample Comment
Results Summary
Analyte Peak Name			Calculated. Concentration (µg/Kg)								Analyte Expected RT				Analyte Actual RT						Accuracy
Doxycycline T1			0.3								3.62				3.61						N/A
Ampicillin T1			< 0								4.52				4.43						N/A
Penicillin G T1			0.4								4.12				4.26						N/A
Penicillin V T1			< 0								2.78				3.22						N/A
Oxaciliin T1			0.4								4.24				4.23						N/A
Cloxacillin T1			0.6								4.27				4.29						N/A
Dicloxacillin T1			0.1								4.27				4.34						N/A
Nafcillin T1			< 0								4.47				4.44						N/A
Cefapirin T1			< 0								2.43				2.08						N/A
Cefalexin T1			0								2.78				2.76						N/A
Cefquinome T1			< 0								2.66				2.43						N/A
Danofloxacin T1			0								2.99				2.98						N/A
Difloxacin T1			0.2								3.18				3.17						N/A
Enrofloxacin T1			0.1								3.03				3.01						N/A
Flumequine T1			0.2								4.18				4.18						N/A
Ciprofloxacin T1			< 0								2.91				3.18						N/A
Marbofloxacin T1			< 0								2.78				2.77						N/A
Oxolonic acid T1			< 0								3.8				3.8						N/A
Sarafloxacin 1			< 0								4.7				4.56						N/A
Sulfamerazine T1			0.1								2.76				2.42						N/A
Sulfamethazine T1			< 0								3.01				2.99						N/A
Sulfamonomethoxine T1			0.1								3.05				2.99						N/A
Sulfapyridine T1			0.2								2.65				2.53						N/A
Sulfaquinoxaline T1			0.1								3.81				3.8						N/A
Sulfathiazole T1			0								2.55				2.82						N/A
Sulfadimethoxine T1			< 0								3.76				3.76						N/A
Sulfachloropyridazine T1			0								3.24				3.06						N/A
Sulfadiazine T1			0.2								2.43				2.54						N/A
Sulfamethoxypyridazine T1			< 0								3.03				2.86						N/A
Trimethoprim T1			< 0								2.72				2.68						N/A
Sulfisoxasole T1			0								3.45				3.45						N/A
Sulfamethizole T1			0.3								2.97				2.95						N/A
Amoxicillin T1			< 0								4.08				4.24						N/A
Erythromycin T1			0								4.06				3.91						N/A
Tilmicosin T1			0.1								3.68				3.67						N/A
Tylosin T1			< 0								4.06				4.05						N/A
Tulathromycin T1			0								2.84				2.82						N/A
Gamithromycin T1			< 0								3.53				3.52						N/A
Lincomycin T1			< 0								2.57				2.55						N/A
Pirlimycin T1			< 0								3.51				3.5						N/A
Tildipirosin T1			0.1								2.42				2.41						N/A
Sample Name	S20									Injection Vial							29
Sample ID										Injection Volume							5
Sample Type	Unknown									Algorithm Used							MQ4
Acquisition Date	2024/07/15 22:02:51									Dilution Factor							1
Acquisition Method	2024 ANTIMICROBIALS.dam									Weight to Volume							N/A
Project	R. Tshepho PhD\2024_05_29									Instrument Name							QTRAP 6500+ Low Mass
Data File	DataBUAN STUDENT MOGODU ANTIMICROBIALS.wiff
Result Table	BUAN STUDENT ANTIMICROMIBIALS
Sample Comment
Results Summary
Analyte Peak Name			Calculated. Concentration (µg/Kg)								Analyte Expected RT				Analyte Actual RT						Accuracy
Doxycycline T1			0.3								3.62				3.61						N/A
Ampicillin T1			< 0								4.52				4.43						N/A
Penicillin G T1			0.4								4.12				4.26						N/A
Penicillin V T1			< 0								2.78				3.22						N/A
Oxaciliin T1			0.4								4.24				4.23						N/A
Cloxacillin T1			0.6								4.27				4.29						N/A
Dicloxacillin T1			0.1								4.27				4.34						N/A
Nafcillin T1			< 0								4.47				4.44						N/A
Cefapirin T1			< 0								2.43				2.08						N/A
Cefalexin T1			0								2.78				2.76						N/A
Cefquinome T1			< 0								2.66				2.43						N/A
Danofloxacin T1			0								2.99				2.98						N/A
Difloxacin T1			0.2								3.18				3.17						N/A
Enrofloxacin T1			0.1								3.03				3.01						N/A
Flumequine T1			0.2								4.18				4.18						N/A
Ciprofloxacin T1			< 0								2.91				3.18						N/A
Marbofloxacin T1			< 0								2.78				2.77						N/A
Oxolonic acid T1			< 0								3.8				3.8						N/A
Sarafloxacin 1			< 0								4.7				4.56						N/A
Sulfamerazine T1			0.1								2.76				2.42						N/A
Sulfamethazine T1			< 0								3.01				2.99						N/A
Sulfamonomethoxine T1			0.1								3.05				2.99						N/A
Sulfapyridine T1			0.2								2.65				2.53						N/A
Sulfaquinoxaline T1			0.1								3.81				3.8						N/A
Sulfathiazole T1			0								2.55				2.82						N/A
Sulfadimethoxine T1			< 0								3.76				3.76						N/A
Sulfachloropyridazine T1			0								3.24				3.06						N/A
Sulfadiazine T1			0.2								2.43				2.54						N/A
Sulfamethoxypyridazine T1			< 0								3.03				2.86						N/A
Trimethoprim T1			< 0								2.72				2.68						N/A
Sulfisoxasole T1			0								3.45				3.45						N/A
Sulfamethizole T1			0.3								2.97				2.95						N/A
Amoxicillin T1			< 0								4.08				4.24						N/A
Erythromycin T1			0								4.06				3.91						N/A
Tilmicosin T1			0.1								3.68				3.67						N/A
Tylosin T1			< 0								4.06				4.05						N/A
Tulathromycin T1			0								2.84				2.82						N/A
Gamithromycin T1			< 0								3.53				3.52						N/A
Lincomycin T1			< 0								2.57				2.55						N/A
Pirlimycin T1			< 0								3.51				3.5						N/A
Tildipirosin T1			0.1								2.42				2.41						N/A
Sample Name	QC 3									Injection Vial							9
Sample ID										Injection Volume							5
Sample Type	Quality Control									Algorithm Used							MQ4
Acquisition Date	2024/07/15 22:17:30									Dilution Factor							1
Acquisition Method	2024 ANTIMICROBIALS.dam									Weight to Volume							N/A
Project	R. Tshepho PhD\2024_05_29									Instrument Name							QTRAP 6500+ Low Mass
Data File	DataBUAN STUDENT MOGODU ANTIMICROBIALS.wiff
Result Table	BUAN STUDENT ANTIMICROMIBIALS
Sample Comment
Results Summary
Analyte Peak Name				Calculated. Concentration ()				Analyte Expected RT					Analyte Actual RT						Accuracy
Doxycycline T1				45.9				3.62					3.6						91.79
Ampicillin T1				50.3				4.64					4.66						100.63
Penicillin G T1				221.4				4.12					4.13						110.72
Penicillin V T1				166.2				2.78					2.78						110.83
Oxaciliin T1				199				4.24					4.24						99.5
Cloxacillin T1				169.2				4.27					4.31						112.79
Dicloxacillin T1				46.8				4.27					4.33						93.52
Cefapirin T1				15.7				2.43					2.43						78.7
Cefalexin T1				70.4				2.78					2.77						70.44
Cefquinome T1				12.3				2.66					2.66						98.33
Danofloxacin T1				58.4				2.99					2.98						116.71
Difloxacin T1				100.9				3.18					3.17						100.92
Enrofloxacin T1				25.9				3.03					3						103.47
Flumequine T1				74.1				4.18					4.18						74.13
Ciprofloxacin T1				28.3				2.91					2.9						113.11
Marbofloxacin T1				40.5				2.78					2.76						107.92
Oxolonic acid T1				26.9				3.8					3.79						107.73
Sarafloxacin 1				92.9				4.7					4.69						92.87
Sulfamerazine T1				26.3				2.76					2.75						105.09
Sulfamethazine T1				14.9				3.01					3.01						74.33
Sulfamonomethoxine T1				21.4				3.05					3.04						85.47
Sulfapyridine T1				25.8				2.65					2.64						103.25
Sulfaquinoxaline T1				26.9				3.81					3.81						107.65
Sulfathiazole T1				25.3				2.55					2.56						101.19
Sulfadimethoxine T1				22.1				3.76					3.76						88.23
Sulfachloropyridazine T1				22				3.24					3.25						87.83
Sulfadiazine T1				24				2.43					2.43						95.84
Sulfamethoxypyridazine T1				25.5				3.03					3.04						102.02
Trimethoprim T1				26.5				2.72					2.71						105.92
Sulfisoxasole T1				26.4				3.45					3.44						105.52
Sulfamethizole T1				20.5				2.97					2.97						82.2
Erythromycin T1				46.9				4.06					4.04						93.81
Tilmicosin T1				12.2				3.68					3.66						97.76
Tylosin T1				25.4				4.06					4.05						101.52
Analyte Peak Name				Calculated. Concentration ()				Analyte Expected RT					Analyte Actual RT						Accuracy
Spiramycin T1				19.2				3.34					3.3						76.81
Tulathromycin T1				74.4				2.84					2.8						99.18
Gamithromycin T1				23.3				3.53					3.49						93.08
Lincomycin T1				24.3				2.57					2.56						97.34
Pirlimycin T1				26.3				3.51					3.49						105.14
Tildipirosin T1				87.1				2.42					2.41						87.13
Sample Name	S21									Injection Vial							30
Sample ID										Injection Volume							5
Sample Type	Unknown									Algorithm Used							MQ4
Acquisition Date	2024/07/15 22:32:06									Dilution Factor							1
Acquisition Method	2024 ANTIMICROBIALS.dam									Weight to Volume							N/A
Project	R. Tshepho PhD\2024_05_29									Instrument Name							QTRAP 6500+ Low Mass
Data File	DataBUAN STUDENT MOGODU ANTIMICROBIALS.wiff
Result Table	BUAN STUDENT ANTIMICROMIBIALS
Sample Comment
Results Summary
Analyte Peak Name			Calculated. Concentration (µg/Kg)								Analyte Expected RT				Analyte Actual RT						Accuracy
Doxycycline T1			0.3								3.62				3.61						N/A
Ampicillin T1			< 0								4.52				4.43						N/A
Penicillin G T1			0.4								4.12				4.26						N/A
Penicillin V T1			< 0								2.78				3.22						N/A
Oxaciliin T1			0.4								4.24				4.23						N/A
Cloxacillin T1			0.6								4.27				4.29						N/A
Dicloxacillin T1			0.1								4.27				4.34						N/A
Nafcillin T1			< 0								4.47				4.44						N/A
Cefapirin T1			< 0								2.43				2.08						N/A
Cefalexin T1			0								2.78				2.76						N/A
Cefquinome T1			< 0								2.66				2.43						N/A
Danofloxacin T1			0								2.99				2.98						N/A
Difloxacin T1			0.2								3.18				3.17						N/A
Enrofloxacin T1			0.1								3.03				3.01						N/A
Flumequine T1			0.2								4.18				4.18						N/A
Ciprofloxacin T1			< 0								2.91				3.18						N/A
Marbofloxacin T1			< 0								2.78				2.77						N/A
Oxolonic acid T1			< 0								3.8				3.8						N/A
Sarafloxacin 1			< 0								4.7				4.56						N/A
Sulfamerazine T1			0.1								2.76				2.42						N/A
Sulfamethazine T1			< 0								3.01				2.99						N/A
Sulfamonomethoxine T1			0.1								3.05				2.99						N/A
Sulfapyridine T1			0.2								2.65				2.53						N/A
Sulfaquinoxaline T1			0.1								3.81				3.8						N/A
Sulfathiazole T1			0								2.55				2.82						N/A
Sulfadimethoxine T1			< 0								3.76				3.76						N/A
Sulfachloropyridazine T1			0								3.24				3.06						N/A
Sulfadiazine T1			0.2								2.43				2.54						N/A
Sulfamethoxypyridazine T1			< 0								3.03				2.86						N/A
Trimethoprim T1			< 0								2.72				2.68						N/A
Sulfisoxasole T1			0								3.45				3.45						N/A
Sulfamethizole T1			0.3								2.97				2.95						N/A
Amoxicillin T1			< 0								4.08				4.24						N/A
Erythromycin T1			0								4.06				3.91						N/A
Tilmicosin T1			0.1								3.68				3.67						N/A
Tylosin T1			< 0								4.06				4.05						N/A
Tulathromycin T1			0								2.84				2.82						N/A
Gamithromycin T1			< 0								3.53				3.52						N/A
Lincomycin T1			< 0								2.57				2.55						N/A
Pirlimycin T1			< 0								3.51				3.5						N/A
Tildipirosin T1			0.1								2.42				2.41						N/A
Sample Name	S22									Injection Vial							31
Sample ID										Injection Volume							5
Sample Type	Unknown									Algorithm Used							MQ4
Acquisition Date	2024/07/15 22:46:45									Dilution Factor							1
Acquisition Method	2024 ANTIMICROBIALS.dam									Weight to Volume							N/A
Project	R. Tshepho PhD\2024_05_29									Instrument Name							QTRAP 6500+ Low Mass
Data File	DataBUAN STUDENT MOGODU ANTIMICROBIALS.wiff
Result Table	BUAN STUDENT ANTIMICROMIBIALS
Sample Comment
Results Summary
Analyte Peak Name					Calculated. Concentration ()						Analyte Expected RT			Analyte Actual RT							Accuracy
Doxycycline T1					0.1						3.62			3.6							N/A
Ampicillin T1					< 0						4.64			4.55							N/A
Penicillin G T1					1.4						4.12			4.08							N/A
Penicillin V T1					1.2						2.78			2.8							N/A
Oxaciliin T1					0.2						4.24			4.25							N/A
Cloxacillin T1					0.6						4.27			4.53							N/A
Dicloxacillin T1					0.2						4.27			4.32							N/A
Nafcillin T1					< 0						4.47			4.45							N/A
Cefalonium T1					2.8						1.92			2.36							N/A
Cefapirin T1					0.1						2.43			2.32							N/A
Cefalexin T1					< 0						2.78			2.75							N/A
Cefquinome T1					0.2						2.66			2.95							N/A
Danofloxacin T1					0.2						2.99			2.97							N/A
Difloxacin T1					0.3						3.18			3.17							N/A
Enrofloxacin T1					< 0						3.03			3							N/A
Flumequine T1					0.2						4.18			4.18							N/A
Ciprofloxacin T1					< 0						2.91			3.18							N/A
Marbofloxacin T1					0.1						2.78			2.76							N/A
Oxolonic acid T1					< 0						3.8			3.79							N/A
Sarafloxacin 1					< 0						4.7			4.57							N/A
Sulfamerazine T1					< 0						2.76			2.75							N/A
Sulfamethazine T1					< 0						3.01			2.94							N/A
Sulfamonomethoxine T1					0.1						3.05			3.09							N/A
Sulfapyridine T1					< 0						2.65			2.41							N/A
Sulfaquinoxaline T1					< 0						3.81			3.8							N/A
Sulfathiazole T1					< 0						2.55			2.62							N/A
Sulfadimethoxine T1					< 0						3.76			3.74							N/A
Sulfachloropyridazine T1					0.1						3.24			2.9							N/A
Sulfadiazine T1					0						2.43			2.26							N/A
Sulfamethoxypyridazine T1					0						3.03			3.3							N/A
Trimethoprim T1					< 0						2.72			2.67							N/A
Sulfisoxasole T1					< 0						3.45			3.45							N/A
Sulfamethizole T1					0.1						2.97			3.37							N/A
Amoxicillin T1					< 0						4.08			4.04							N/A
Erythromycin T1					0						4.06			4.53							N/A
Tilmicosin T1					0.1						3.68			3.67							N/A
Tylosin T1					< 0						4.06			4.5							N/A
Tulathromycin T1					< 0						2.84			2.81							N/A
Gamithromycin T1					< 0						3.53			3.51							N/A
Lincomycin T1					< 0						2.57			2.55							N/A
Pirlimycin T1					< 0						3.51			3.49							N/A
Tildipirosin T1					< 0						2.42			2.41							N/A
Sample Name	S23									Injection Vial							32
Sample ID										Injection Volume							5
Sample Type	Unknown									Algorithm Used							MQ4
Acquisition Date	2024/07/15 23:01:21									Dilution Factor							1
Acquisition Method	2024 ANTIMICROBIALS.dam									Weight to Volume							N/A
Project	R. Tshepho PhD\2024_05_29									Instrument Name							QTRAP 6500+ Low Mass
Data File	DataBUAN STUDENT MOGODU ANTIMICROBIALS.wiff
Result Table	BUAN STUDENT ANTIMICROMIBIALS
Sample Comment
Results Summary
Analyte Peak Name					Calculated. Concentration ()						Analyte Expected RT			Analyte Actual RT							Accuracy
Doxycycline T1					0.1						3.62			3.6							N/A
Ampicillin T1					< 0						4.64			4.55							N/A
Penicillin G T1					1.4						4.12			4.08							N/A
Penicillin V T1					1.2						2.78			2.8							N/A
Oxaciliin T1					0.2						4.24			4.25							N/A
Cloxacillin T1					0.6						4.27			4.53							N/A
Dicloxacillin T1					0.2						4.27			4.32							N/A
Nafcillin T1					< 0						4.47			4.45							N/A
Cefalonium T1					2.8						1.92			2.36							N/A
Cefapirin T1					0.1						2.43			2.32							N/A
Cefalexin T1					< 0						2.78			2.75							N/A
Cefquinome T1					0.2						2.66			2.95							N/A
Danofloxacin T1					0.2						2.99			2.97							N/A
Difloxacin T1					0.3						3.18			3.17							N/A
Enrofloxacin T1					< 0						3.03			3							N/A
Flumequine T1					0.2						4.18			4.18							N/A
Ciprofloxacin T1					< 0						2.91			3.18							N/A
Marbofloxacin T1					0.1						2.78			2.76							N/A
Oxolonic acid T1					< 0						3.8			3.79							N/A
Sarafloxacin 1					< 0						4.7			4.57							N/A
Sulfamerazine T1					< 0						2.76			2.75							N/A
Sulfamethazine T1					< 0						3.01			2.94							N/A
Sulfamonomethoxine T1					0.1						3.05			3.09							N/A
Sulfapyridine T1					< 0						2.65			2.41							N/A
Sulfaquinoxaline T1					< 0						3.81			3.8							N/A
Sulfathiazole T1					< 0						2.55			2.62							N/A
Sulfadimethoxine T1					< 0						3.76			3.74							N/A
Sulfachloropyridazine T1					0.1						3.24			2.9							N/A
Sulfadiazine T1					0						2.43			2.26							N/A
Sulfamethoxypyridazine T1					0						3.03			3.3							N/A
Trimethoprim T1					< 0						2.72			2.67							N/A
Sulfisoxasole T1					< 0						3.45			3.45							N/A
Sulfamethizole T1					0.1						2.97			3.37							N/A
Amoxicillin T1					< 0						4.08			4.04							N/A
Erythromycin T1					0						4.06			4.53							N/A
Tilmicosin T1					0.1						3.68			3.67							N/A
Tylosin T1					< 0						4.06			4.5							N/A
Tulathromycin T1					< 0						2.84			2.81							N/A
Gamithromycin T1					< 0						3.53			3.51							N/A
Lincomycin T1					< 0						2.57			2.55							N/A
Pirlimycin T1					< 0						3.51			3.49							N/A
Tildipirosin T1					< 0						2.42			2.41							N/A
Sample Name	S24									Injection Vial							33
Sample ID										Injection Volume							5
Sample Type	Unknown									Algorithm Used							MQ4
Acquisition Date	2024/07/15 23:15:58									Dilution Factor							1
Acquisition Method	2024 ANTIMICROBIALS.dam									Weight to Volume							N/A
Project	R. Tshepho PhD\2024_05_29									Instrument Name							QTRAP 6500+ Low Mass
Data File	DataBUAN STUDENT MOGODU ANTIMICROBIALS.wiff
Result Table	BUAN STUDENT ANTIMICROMIBIALS
Sample Comment
Results Summary
Analyte Peak Name					Calculated. Concentration ()						Analyte Expected RT			Analyte Actual RT							Accuracy
Doxycycline T1					0.1						3.62			3.6							N/A
Ampicillin T1					< 0						4.64			4.55							N/A
Penicillin G T1					1.4						4.12			4.08							N/A
Penicillin V T1					1.2						2.78			2.8							N/A
Oxaciliin T1					0.2						4.24			4.25							N/A
Cloxacillin T1					0.6						4.27			4.53							N/A
Dicloxacillin T1					0.2						4.27			4.32							N/A
Nafcillin T1					< 0						4.47			4.45							N/A
Cefalonium T1					2.8						1.92			2.36							N/A
Cefapirin T1					0.1						2.43			2.32							N/A
Cefalexin T1					< 0						2.78			2.75							N/A
Cefquinome T1					0.2						2.66			2.95							N/A
Danofloxacin T1					0.2						2.99			2.97							N/A
Difloxacin T1					0.3						3.18			3.17							N/A
Enrofloxacin T1					< 0						3.03			3							N/A
Flumequine T1					0.2						4.18			4.18							N/A
Ciprofloxacin T1					< 0						2.91			3.18							N/A
Marbofloxacin T1					0.1						2.78			2.76							N/A
Oxolonic acid T1					< 0						3.8			3.79							N/A
Sarafloxacin 1					< 0						4.7			4.57							N/A
Sulfamerazine T1					< 0						2.76			2.75							N/A
Sulfamethazine T1					9.2						3.01			3.01							N/A
Sulfamonomethoxine T1					0.1						3.05			3.09							N/A
Sulfapyridine T1					< 0						2.65			2.41							N/A
Sulfaquinoxaline T1					< 0						3.81			3.8							N/A
Sulfathiazole T1					< 0						2.55			2.62							N/A
Sulfadimethoxine T1					< 0						3.76			3.74							N/A
Sulfachloropyridazine T1					0.1						3.24			2.9							N/A
Sulfadiazine T1					0						2.43			2.26							N/A
Sulfamethoxypyridazine T1					0						3.03			3.3							N/A
Trimethoprim T1					< 0						2.72			2.67							N/A
Sulfisoxasole T1					< 0						3.45			3.45							N/A
Sulfamethizole T1					0.1						2.97			3.37							N/A
Amoxicillin T1					< 0						4.08			4.04							N/A
Erythromycin T1					0						4.06			4.53							N/A
Tilmicosin T1					0.1						3.68			3.67							N/A
Tylosin T1					< 0						4.06			4.5							N/A
Tulathromycin T1					< 0						2.84			2.81							N/A
Gamithromycin T1					< 0						3.53			3.51							N/A
Lincomycin T1					< 0						2.57			2.55							N/A
Pirlimycin T1					< 0						3.51			3.49							N/A
Tildipirosin T1					< 0						2.42			2.41							N/A
Sample Name	S25									Injection Vial							34
Sample ID										Injection Volume							5
Sample Type	Unknown									Algorithm Used							MQ4
Acquisition Date	2024/07/15 23:30:37									Dilution Factor							1
Acquisition Method	2024 ANTIMICROBIALS.dam									Weight to Volume							N/A
Project	R. Tshepho PhD\2024_05_29									Instrument Name							QTRAP 6500+ Low Mass
Data File	DataBUAN STUDENT MOGODU ANTIMICROBIALS.wiff
Result Table	BUAN STUDENT ANTIMICROMIBIALS
Sample Comment
Results Summary
Analyte Peak Name					Calculated. Concentration ()						Analyte Expected RT			Analyte Actual RT							Accuracy
Doxycycline T1					0.1						3.62			3.6							N/A
Ampicillin T1					< 0						4.64			4.55							N/A
Penicillin G T1					1.4						4.12			4.08							N/A
Penicillin V T1					1.2						2.78			2.8							N/A
Oxaciliin T1					0.2						4.24			4.25							N/A
Cloxacillin T1					0.6						4.27			4.53							N/A
Dicloxacillin T1					0.2						4.27			4.32							N/A
Nafcillin T1					< 0						4.47			4.45							N/A
Cefalonium T1					2.8						1.92			2.36							N/A
Cefapirin T1					0.1						2.43			2.32							N/A
Cefalexin T1					< 0						2.78			2.75							N/A
Cefquinome T1					0.2						2.66			2.95							N/A
Danofloxacin T1					0.2						2.99			2.97							N/A
Difloxacin T1					0.3						3.18			3.17							N/A
Enrofloxacin T1					< 0						3.03			3							N/A
Flumequine T1					0.2						4.18			4.18							N/A
Ciprofloxacin T1					< 0						2.91			3.18							N/A
Marbofloxacin T1					0.1						2.78			2.76							N/A
Oxolonic acid T1					< 0						3.8			3.79							N/A
Sarafloxacin 1					< 0						4.7			4.57							N/A
Sulfamerazine T1					< 0						2.76			2.75							N/A
Sulfamethazine T1					9.2						3.01			3.01							N/A
Sulfamonomethoxine T1					0.1						3.05			3.09							N/A
Sulfapyridine T1					< 0						2.65			2.41							N/A
Sulfaquinoxaline T1					< 0						3.81			3.8							N/A
Sulfathiazole T1					< 0						2.55			2.62							N/A
Sulfadimethoxine T1					< 0						3.76			3.74							N/A
Sulfachloropyridazine T1					0.1						3.24			2.9							N/A
Sulfadiazine T1					0						2.43			2.26							N/A
Sulfamethoxypyridazine T1					0						3.03			3.3							N/A
Trimethoprim T1					< 0						2.72			2.67							N/A
Sulfisoxasole T1					< 0						3.45			3.45							N/A
Sulfamethizole T1					0.1						2.97			3.37							N/A
Amoxicillin T1					< 0						4.08			4.04							N/A
Erythromycin T1					0						4.06			4.53							N/A
Tilmicosin T1					0.1						3.68			3.67							N/A
Tylosin T1					< 0						4.06			4.5							N/A
Tulathromycin T1					< 0						2.84			2.81							N/A
Gamithromycin T1					< 0						3.53			3.51							N/A
Lincomycin T1					< 0						2.57			2.55							N/A
Pirlimycin T1					< 0						3.51			3.49							N/A
Tildipirosin T1					< 0						2.42			2.41							N/A
Sample Name	S26									Injection Vial							35
Sample ID										Injection Volume							5
Sample Type	Unknown									Algorithm Used							MQ4
Acquisition Date	2024/07/15 23:45:13									Dilution Factor							1
Acquisition Method	2024 ANTIMICROBIALS.dam									Weight to Volume							N/A
Project	R. Tshepho PhD\2024_05_29									Instrument Name							QTRAP 6500+ Low Mass
Data File	DataBUAN STUDENT MOGODU ANTIMICROBIALS.wiff
Result Table	BUAN STUDENT ANTIMICROMIBIALS
Sample Comment
Results Summary
Analyte Peak Name					Calculated. Concentration ()						Analyte Expected RT			Analyte Actual RT							Accuracy
Doxycycline T1					0.1						3.62			3.6							N/A
Ampicillin T1					< 0						4.64			4.55							N/A
Penicillin G T1					1.4						4.12			4.08							N/A
Penicillin V T1					1.2						2.78			2.8							N/A
Oxaciliin T1					0.2						4.24			4.25							N/A
Cloxacillin T1					0.6						4.27			4.53							N/A
Dicloxacillin T1					0.2						4.27			4.32							N/A
Nafcillin T1					< 0						4.47			4.45							N/A
Cefalonium T1					2.8						1.92			2.36							N/A
Cefapirin T1					0.1						2.43			2.32							N/A
Cefalexin T1					< 0						2.78			2.75							N/A
Cefquinome T1					0.2						2.66			2.95							N/A
Danofloxacin T1					0.2						2.99			2.97							N/A
Difloxacin T1					0.3						3.18			3.17							N/A
Enrofloxacin T1					< 0						3.03			3							N/A
Flumequine T1					0.2						4.18			4.18							N/A
Ciprofloxacin T1					< 0						2.91			3.18							N/A
Marbofloxacin T1					0.1						2.78			2.76							N/A
Oxolonic acid T1					< 0						3.8			3.79							N/A
Sarafloxacin 1					< 0						4.7			4.57							N/A
Sulfamerazine T1					< 0						2.76			2.75							N/A
Sulfamethazine T1					9.2						3.01			3.01							N/A
Sulfamonomethoxine T1					0.1						3.05			3.09							N/A
Sulfapyridine T1					< 0						2.65			2.41							N/A
Sulfaquinoxaline T1					< 0						3.81			3.8							N/A
Sulfathiazole T1					< 0						2.55			2.62							N/A
Sulfadimethoxine T1					< 0						3.76			3.74							N/A
Sulfachloropyridazine T1					0.1						3.24			2.9							N/A
Sulfadiazine T1					0						2.43			2.26							N/A
Sulfamethoxypyridazine T1					0						3.03			3.3							N/A
Trimethoprim T1					< 0						2.72			2.67							N/A
Sulfisoxasole T1					< 0						3.45			3.45							N/A
Sulfamethizole T1					0.1						2.97			3.37							N/A
Amoxicillin T1					< 0						4.08			4.04							N/A
Erythromycin T1					0						4.06			4.53							N/A
Tilmicosin T1					0.1						3.68			3.67							N/A
Tylosin T1					< 0						4.06			4.5							N/A
Tulathromycin T1					< 0						2.84			2.81							N/A
Gamithromycin T1					< 0						3.53			3.51							N/A
Lincomycin T1					< 0						2.57			2.55							N/A
Pirlimycin T1					< 0						3.51			3.49							N/A
Tildipirosin T1					< 0						2.42			2.41							N/A
Sample Name	S27									Injection Vial							36
Sample ID										Injection Volume							5
Sample Type	Unknown									Algorithm Used							MQ4
Acquisition Date	2024/07/15 23:59:49									Dilution Factor							1
Acquisition Method	2024 ANTIMICROBIALS.dam									Weight to Volume							N/A
Project	R. Tshepho PhD\2024_05_29									Instrument Name							QTRAP 6500+ Low Mass
Data File	DataBUAN STUDENT MOGODU ANTIMICROBIALS.wiff
Result Table	BUAN STUDENT ANTIMICROMIBIALS
Sample Comment
Results Summary
Analyte Peak Name					Calculated. Concentration ()						Analyte Expected RT			Analyte Actual RT							Accuracy
Doxycycline T1					0.1						3.62			3.6							N/A
Ampicillin T1					< 0						4.64			4.55							N/A
Penicillin G T1					1.4						4.12			4.08							N/A
Penicillin V T1					1.2						2.78			2.8							N/A
Oxaciliin T1					0.2						4.24			4.25							N/A
Cloxacillin T1					0.6						4.27			4.53							N/A
Dicloxacillin T1					0.2						4.27			4.32							N/A
Nafcillin T1					< 0						4.47			4.45							N/A
Cefalonium T1					2.8						1.92			2.36							N/A
Cefapirin T1					0.1						2.43			2.32							N/A
Cefalexin T1					< 0						2.78			2.75							N/A
Cefquinome T1					0.2						2.66			2.95							N/A
Danofloxacin T1					0.2						2.99			2.97							N/A
Difloxacin T1					0.3						3.18			3.17							N/A
Enrofloxacin T1					< 0						3.03			3							N/A
Flumequine T1					0.2						4.18			4.18							N/A
Ciprofloxacin T1					< 0						2.91			3.18							N/A
Marbofloxacin T1					0.1						2.78			2.76							N/A
Oxolonic acid T1					< 0						3.8			3.79							N/A
Sarafloxacin 1					< 0						4.7			4.57							N/A
Sulfamerazine T1					< 0						2.76			2.75							N/A
Sulfamethazine T1					9.2						3.01			3.01							N/A
Sulfamonomethoxine T1					0.1						3.05			3.09							N/A
Sulfapyridine T1					< 0						2.65			2.41							N/A
Sulfaquinoxaline T1					< 0						3.81			3.8							N/A
Sulfathiazole T1					< 0						2.55			2.62							N/A
Sulfadimethoxine T1					< 0						3.76			3.74							N/A
Sulfachloropyridazine T1					0.1						3.24			2.9							N/A
Sulfadiazine T1					0						2.43			2.26							N/A
Sulfamethoxypyridazine T1					0						3.03			3.3							N/A
Trimethoprim T1					< 0						2.72			2.67							N/A
Sulfisoxasole T1					< 0						3.45			3.45							N/A
Sulfamethizole T1					0.1						2.97			3.37							N/A
Amoxicillin T1					< 0						4.08			4.04							N/A
Erythromycin T1					0						4.06			4.53							N/A
Tilmicosin T1					0.1						3.68			3.67							N/A
Tylosin T1					< 0						4.06			4.5							N/A
Tulathromycin T1					< 0						2.84			2.81							N/A
Gamithromycin T1					< 0						3.53			3.51							N/A
Lincomycin T1					< 0						2.57			2.55							N/A
Pirlimycin T1					< 0						3.51			3.49							N/A
Tildipirosin T1					< 0						2.42			2.41							N/A
Sample Name	S28									Injection Vial							37
Sample ID										Injection Volume							5
Sample Type	Unknown									Algorithm Used							MQ4
Acquisition Date	2024/07/16 00:14:25									Dilution Factor							1
Acquisition Method	2024 ANTIMICROBIALS.dam									Weight to Volume							N/A
Project	R. Tshepho PhD\2024_05_29									Instrument Name							QTRAP 6500+ Low Mass
Data File	DataBUAN STUDENT MOGODU ANTIMICROBIALS.wiff
Result Table	BUAN STUDENT ANTIMICROMIBIALS
Sample Comment
Results Summary
Analyte Peak Name					Calculated. Concentration ()						Analyte Expected RT			Analyte Actual RT							Accuracy
Doxycycline T1					0.1						3.62			3.6							N/A
Ampicillin T1					< 0						4.64			4.55							N/A
Penicillin G T1					1.4						4.12			4.08							N/A
Penicillin V T1					1.2						2.78			2.8							N/A
Oxaciliin T1					0.2						4.24			4.25							N/A
Cloxacillin T1					0.6						4.27			4.53							N/A
Dicloxacillin T1					0.2						4.27			4.32							N/A
Nafcillin T1					< 0						4.47			4.45							N/A
Cefalonium T1					2.8						1.92			2.36							N/A
Cefapirin T1					0.1						2.43			2.32							N/A
Cefalexin T1					< 0						2.78			2.75							N/A
Cefquinome T1					0.2						2.66			2.95							N/A
Danofloxacin T1					0.2						2.99			2.97							N/A
Difloxacin T1					0.3						3.18			3.17							N/A
Enrofloxacin T1					< 0						3.03			3							N/A
Flumequine T1					0.2						4.18			4.18							N/A
Ciprofloxacin T1					< 0						2.91			3.18							N/A
Marbofloxacin T1					0.1						2.78			2.76							N/A
Oxolonic acid T1					< 0						3.8			3.79							N/A
Sarafloxacin 1					< 0						4.7			4.57							N/A
Sulfamerazine T1					< 0						2.76			2.75							N/A
Sulfamethazine T1					23.8						3.01			3.02							N/A								MRL = 100 μg/kg
Sulfamonomethoxine T1					0.1						3.05			3.09							N/A
Sulfapyridine T1					< 0						2.65			2.41							N/A
Sulfaquinoxaline T1					< 0						3.81			3.8							N/A
Sulfathiazole T1					< 0						2.55			2.62							N/A
Sulfadimethoxine T1					< 0						3.76			3.74							N/A
Sulfachloropyridazine T1					0.1						3.24			2.9							N/A
Sulfadiazine T1					0						2.43			2.26							N/A
Sulfamethoxypyridazine T1					0						3.03			3.3							N/A
Trimethoprim T1					< 0						2.72			2.67							N/A
Sulfisoxasole T1					< 0						3.45			3.45							N/A
Sulfamethizole T1					0.1						2.97			3.37							N/A
Amoxicillin T1					< 0						4.08			4.04							N/A
Erythromycin T1					0						4.06			4.53							N/A
Tilmicosin T1					0.1						3.68			3.67							N/A
Tylosin T1					< 0						4.06			4.5							N/A
Tulathromycin T1					< 0						2.84			2.81							N/A
Gamithromycin T1					< 0						3.53			3.51							N/A
Lincomycin T1					< 0						2.57			2.55							N/A
Pirlimycin T1					< 0						3.51			3.49							N/A
Tildipirosin T1					< 0						2.42			2.41							N/A
Sample Name	S29									Injection Vial							38
Sample ID										Injection Volume							5
Sample Type	Unknown									Algorithm Used							MQ4
Acquisition Date	2024/07/16 00:29:01									Dilution Factor							1
Acquisition Method	2024 ANTIMICROBIALS.dam									Weight to Volume							N/A
Project	R. Tshepho PhD\2024_05_29									Instrument Name							QTRAP 6500+ Low Mass
Data File	DataBUAN STUDENT MOGODU ANTIMICROBIALS.wiff
Result Table	BUAN STUDENT ANTIMICROMIBIALS
Sample Comment
Results Summary
Analyte Peak Name					Calculated. Concentration ()						Analyte Expected RT			Analyte Actual RT							Accuracy
Doxycycline T1					0.1						3.62			3.6							N/A
Ampicillin T1					< 0						4.64			4.55							N/A
Penicillin G T1					1.4						4.12			4.08							N/A
Penicillin V T1					1.2						2.78			2.8							N/A
Oxaciliin T1					0.2						4.24			4.25							N/A
Cloxacillin T1					0.6						4.27			4.53							N/A
Dicloxacillin T1					0.2						4.27			4.32							N/A
Nafcillin T1					< 0						4.47			4.45							N/A
Cefalonium T1					2.8						1.92			2.36							N/A
Cefapirin T1					0.1						2.43			2.32							N/A
Cefalexin T1					< 0						2.78			2.75							N/A
Cefquinome T1					0.2						2.66			2.95							N/A
Danofloxacin T1					0.2						2.99			2.97							N/A
Difloxacin T1					0.3						3.18			3.17							N/A
Enrofloxacin T1					< 0						3.03			3							N/A
Flumequine T1					0.2						4.18			4.18							N/A
Ciprofloxacin T1					< 0						2.91			3.18							N/A
Marbofloxacin T1					0.1						2.78			2.76							N/A
Oxolonic acid T1					< 0						3.8			3.79							N/A
Sarafloxacin 1					< 0						4.7			4.57							N/A
Sulfamerazine T1					< 0						2.76			2.75							N/A
Sulfamethazine T1					9.2						3.01			3.01							N/A
Sulfamonomethoxine T1					0.1						3.05			3.09							N/A
Sulfapyridine T1					< 0						2.65			2.41							N/A
Sulfaquinoxaline T1					< 0						3.81			3.8							N/A
Sulfathiazole T1					< 0						2.55			2.62							N/A
Sulfadimethoxine T1					< 0						3.76			3.74							N/A
Sulfachloropyridazine T1					0.1						3.24			2.9							N/A
Sulfadiazine T1					0						2.43			2.26							N/A
Sulfamethoxypyridazine T1					0						3.03			3.3							N/A
Trimethoprim T1					< 0						2.72			2.67							N/A
Sulfisoxasole T1					< 0						3.45			3.45							N/A
Sulfamethizole T1					0.1						2.97			3.37							N/A
Amoxicillin T1					< 0						4.08			4.04							N/A
Erythromycin T1					0						4.06			4.53							N/A
Tilmicosin T1					0.1						3.68			3.67							N/A
Tylosin T1					< 0						4.06			4.5							N/A
Tulathromycin T1					< 0						2.84			2.81							N/A
Gamithromycin T1					< 0						3.53			3.51							N/A
Lincomycin T1					< 0						2.57			2.55							N/A
Pirlimycin T1					< 0						3.51			3.49							N/A
Tildipirosin T1					< 0						2.42			2.41							N/A
Sample Name	S30									Injection Vial							39
Sample ID										Injection Volume							5
Sample Type	Unknown									Algorithm Used							MQ4
Acquisition Date	2024/07/16 00:43:37									Dilution Factor							1
Acquisition Method	2024 ANTIMICROBIALS.dam									Weight to Volume							N/A
Project	R. Tshepho PhD\2024_05_29									Instrument Name							QTRAP 6500+ Low Mass
Data File	DataBUAN STUDENT MOGODU ANTIMICROBIALS.wiff
Result Table	BUAN STUDENT ANTIMICROMIBIALS
Sample Comment
Results Summary
Analyte Peak Name					Calculated. Concentration ()						Analyte Expected RT			Analyte Actual RT							Accuracy
Doxycycline T1					0.1						3.62			3.6							N/A
Ampicillin T1					< 0						4.64			4.55							N/A
Penicillin G T1					1.4						4.12			4.08							N/A
Penicillin V T1					1.2						2.78			2.8							N/A
Oxaciliin T1					0.2						4.24			4.25							N/A
Cloxacillin T1					0.6						4.27			4.53							N/A
Dicloxacillin T1					0.2						4.27			4.32							N/A
Nafcillin T1					< 0						4.47			4.45							N/A
Cefalonium T1					2.8						1.92			2.36							N/A
Cefapirin T1					0.1						2.43			2.32							N/A
Cefalexin T1					< 0						2.78			2.75							N/A
Cefquinome T1					0.2						2.66			2.95							N/A
Danofloxacin T1					0.2						2.99			2.97							N/A
Difloxacin T1					0.3						3.18			3.17							N/A
Enrofloxacin T1					< 0						3.03			3							N/A
Flumequine T1					0.2						4.18			4.18							N/A
Ciprofloxacin T1					< 0						2.91			3.18							N/A
Marbofloxacin T1					0.1						2.78			2.76							N/A
Oxolonic acid T1					< 0						3.8			3.79							N/A
Sarafloxacin 1					< 0						4.7			4.57							N/A
Sulfamerazine T1					< 0						2.76			2.75							N/A
Sulfamethazine T1					9.2						3.01			3.01							N/A
Sulfamonomethoxine T1					0.1						3.05			3.09							N/A
Sulfapyridine T1					< 0						2.65			2.41							N/A
Sulfaquinoxaline T1					< 0						3.81			3.8							N/A
Sulfathiazole T1					< 0						2.55			2.62							N/A
Sulfadimethoxine T1					< 0						3.76			3.74							N/A
Sulfachloropyridazine T1					0.1						3.24			2.9							N/A
Sulfadiazine T1					0						2.43			2.26							N/A
Sulfamethoxypyridazine T1					0						3.03			3.3							N/A
Trimethoprim T1					< 0						2.72			2.67							N/A
Sulfisoxasole T1					< 0						3.45			3.45							N/A
Sulfamethizole T1					0.1						2.97			3.37							N/A
Amoxicillin T1					< 0						4.08			4.04							N/A
Erythromycin T1					0						4.06			4.53							N/A
Tilmicosin T1					0.1						3.68			3.67							N/A
Tylosin T1					< 0						4.06			4.5							N/A
Tulathromycin T1					< 0						2.84			2.81							N/A
Gamithromycin T1					< 0						3.53			3.51							N/A
Lincomycin T1					< 0						2.57			2.55							N/A
Pirlimycin T1					< 0						3.51			3.49							N/A
Tildipirosin T1					< 0						2.42			2.41							N/A
Sample Name	QC 1									Injection Vial							7
Sample ID										Injection Volume							5
Sample Type	Quality Control									Algorithm Used							MQ4
Acquisition Date	2024/07/16 00:58:16									Dilution Factor							1
Acquisition Method	2024 ANTIMICROBIALS.dam									Weight to Volume							N/A
Project	R. Tshepho PhD\2024_05_29									Instrument Name							QTRAP 6500+ Low Mass
Data File	DataBUAN STUDENT MOGODU ANTIMICROBIALS.wiff
Result Table	BUAN STUDENT ANTIMICROMIBIALS
Sample Comment
Results Summary
Analyte Peak Name						Calculated. Concentration ()				Analyte Expected RT				Analyte Actual RT					Accuracy
Doxycycline T1						37.5				3.62				3.6					75.04
Ampicillin T1						53.5				4.64				4.66					107.05
Ampicillin T2						53.5				2.78				2.78					107
Penicillin G T1						237.7				4.12				4.12					118.87
Penicillin V T1						162.6				2.78				2.78					108.39
Oxaciliin T1						222.1				4.24				4.24					111.05
Cloxacillin T1						138.4				4.27				4.27					92.26
Dicloxacillin T1						26.5				4.27				4.34					52.92
Cefalonium T1						17.5				1.92				1.73					N/A
Cefapirin T1						18.6				2.43				2.43					93.22
Cefalexin T1						74.4				2.78				2.76					74.42
Cefquinome T1						15.1				2.66				2.64					121.14
Danofloxacin T1						49.5				2.99				2.98					98.91
Difloxacin T1						87.9				3.18				3.16					87.94
Enrofloxacin T1						27				3.03				3					107.91
Flumequine T1						78.9				4.18				4.17					78.91
Ciprofloxacin T1						26.7				2.91				2.9					106.85
Marbofloxacin T1						40				2.78				2.75					106.71
Oxolonic acid T1						26.8				3.8				3.78					107.27
Sarafloxacin 1						94.7				4.7				4.69					94.66
Sulfamerazine T1						27.3				2.76				2.76					105.01
Sulfamethazine T1						16.5				3.01				3.01					82.69
Sulfamonomethoxine T1						26.8				3.05				3.03					107.18
Sulfapyridine T1						27.5				2.65				2.64					110.09
Sulfaquinoxaline T1						23.1				3.81				3.8					92.55
Sulfathiazole T1						24.5				2.55				2.56					98.18
Sulfadimethoxine T1						22.1				3.76				3.76					88.2
Sulfachloropyridazine T1						25.3				3.24				3.25					101.06
Sulfadiazine T1						24.6				2.43				2.44					98.29
Sulfamethoxypyridazine T1						23.6				3.03				3.03					94.25
Trimethoprim T1						24.6				2.72				2.7					98.54
Sulfisoxasole T1						23.7				3.45				3.44					94.91
Sulfamethizole T1						22.2				2.97				2.96					88.65
Erythromycin T1						47.7				4.06				4.04					95.32
Analyte Peak Name						Calculated. Concentration ()				Analyte Expected RT				Analyte Actual RT					Accuracy
Tilmicosin T1						9.9				3.68				3.64					78.98
Tylosin T1						27				4.06				4.05					107.81
Spiramycin T1						17.2				3.34				3.3					68.62
Tulathromycin T1						69.9				2.84				2.8					93.26
Gamithromycin T1						23.7				3.53				3.48					94.72
Lincomycin T1						25.5				2.57				2.56					101.85
Pirlimycin T1						24.4				3.51				3.48					97.77
Tildipirosin T1						103.5				2.42				2.4					103.45
Analyte Name: Doxycycline T1
Internal Standard: N/A
Data File Acquisition Date Acquisition Method Project	DataBUAN STUDENT MOGODU ANTIMICROBIALS.wiff 2024/07/15 15:28:16 2024 ANTIMICROBIALS.dam R. Tshepho PhD\2024_05_29									Result Table Algorithm Used Instrument Name							BUAN STUDENT ANTIMICROMIBIALS MQ4 QTRAP 6500+ Low Mass
Regression Equation: y = 6.28872e5 x + 24021.06694 (r = 0.99851) (weighting: 1 / x)
Expected Concentration		Number of Values					Mean Calculated Concentration					% Accuracy						Std. Deviation					%CV
0		1 of 1					0					N/A						N/A					N/A
25		1 of 1					23.8					95.4						N/A					N/A
100		1 of 1					103.4					103.4						N/A					N/A
150		1 of 1					159.3					106.2						N/A					N/A
200		1 of 1					188.4					94.2						N/A					N/A
Analyte Name: Penicillin G T1
Internal Standard: N/A
Data File Acquisition Date Acquisition Method Project	DataBUAN STUDENT MOGODU ANTIMICROBIALS.wiff 2024/07/15 15:28:16 2024 ANTIMICROBIALS.dam R. Tshepho PhD\2024_05_29									Result Table Algorithm Used Instrument Name							BUAN STUDENT ANTIMICROMIBIALS MQ4 QTRAP 6500+ Low Mass
Regression Equation: y = 1296.03567 x + 690.00115 (r = 0.99818) (weighting: 1 / x)
Expected Concentration		Number of Values					Mean Calculated Concentration					% Accuracy						Std. Deviation					%CV
0		0 of 1					N/A					N/A						N/A					N/A
75		1 of 1					83.8					111.7						N/A					N/A
300		1 of 1					304.1					101.4						N/A					N/A
450		1 of 1					412.6					91.7						N/A					N/A
600		1 of 1					624.5					104.1						N/A					N/A
Analyte Name: Oxaciliin T1
Internal Standard: N/A
Data File Acquisition Date Acquisition Method Project	DataBUAN STUDENT MOGODU ANTIMICROBIALS.wiff 2024/07/15 15:28:16 2024 ANTIMICROBIALS.dam R. Tshepho PhD\2024_05_29									Result Table Algorithm Used Instrument Name							BUAN STUDENT ANTIMICROMIBIALS MQ4 QTRAP 6500+ Low Mass
Regression Equation: y = 6869.60587 x + 9817.00320 (r = 0.99296) (weighting: 1 / x)
Expected Concentration		Number of Values					Mean Calculated Concentration					% Accuracy						Std. Deviation					%CV
0		1 of 1					0					N/A						N/A					N/A
75		1 of 1					76.3					101.7						N/A					N/A
300		1 of 1					288.7					96.2						N/A					N/A
450		1 of 1					383					85.1						N/A					N/A
600		1 of 1					677					112.8						N/A					N/A
Analyte Name: Dicloxacillin T1
Internal Standard: N/A
Data File Acquisition Date Acquisition Method Project	DataBUAN STUDENT MOGODU ANTIMICROBIALS.wiff 2024/07/15 15:28:16 2024 ANTIMICROBIALS.dam R. Tshepho PhD\2024_05_29									Result Table Algorithm Used Instrument Name							BUAN STUDENT ANTIMICROMIBIALS MQ4 QTRAP 6500+ Low Mass
Regression Equation: y = 3.26202e4 x + 2990.29256 (r = 0.99860) (weighting: 1 / x)
Expected Concentration		Number of Values					Mean Calculated Concentration					% Accuracy						Std. Deviation					%CV
0		0 of 1					N/A					N/A						N/A					N/A
75		1 of 1					74.2					98.9						N/A					N/A
300		1 of 1					318.5					106.2						N/A					N/A
450		1 of 1					468					104						N/A					N/A
600		1 of 1					564.3					94.1						N/A					N/A
Analyte Name: Nafcillin T1
Internal Standard: N/A
Data File Acquisition Date Acquisition Method Project	DataBUAN STUDENT MOGODU ANTIMICROBIALS.wiff 2024/07/15 15:28:16 2024 ANTIMICROBIALS.dam R. Tshepho PhD\2024_05_29									Result Table Algorithm Used Instrument Name							BUAN STUDENT ANTIMICROMIBIALS MQ4 QTRAP 6500+ Low Mass
Regression Equation: y = 2.14029e5 x + 2.21294e6 (r = 0.99745) (weighting: 1 / x)
Expected Concentration		Number of Values					Mean Calculated Concentration					% Accuracy						Std. Deviation					%CV
0		0 of 1					N/A					N/A						N/A					N/A
75		1 of 1					96.8					129.1						N/A					N/A
300		1 of 1					304.6					101.5						N/A					N/A
450		1 of 1					430.9					95.8						N/A					N/A
600		1 of 1					592.7					98.8						N/A					N/A
Analyte Name: Cefapirin T1
Internal Standard: N/A
Data File Acquisition Date Acquisition Method Project	DataBUAN STUDENT MOGODU ANTIMICROBIALS.wiff 2024/07/15 15:28:16 2024 ANTIMICROBIALS.dam R. Tshepho PhD\2024_05_29									Result Table Algorithm Used Instrument Name							BUAN STUDENT ANTIMICROMIBIALS MQ4 QTRAP 6500+ Low Mass
Regression Equation: y = 20660.96361 x + 1840.02631 (r = 0.99693) (weighting: 1 / x)
Expected Concentration		Number of Values					Mean Calculated Concentration					% Accuracy						Std. Deviation					%CV
0		0 of 1					N/A					N/A						N/A					N/A
12.5		1 of 1					13.8					110.2						N/A					N/A
50		1 of 1					55.8					111.6						N/A					N/A
75		1 of 1					76					101.3						N/A					N/A
100		1 of 1					91.9					92						N/A					N/A
Analyte Name: Cefalexin T1
Internal Standard: N/A
Data File Acquisition Date Acquisition Method Project	DataBUAN STUDENT MOGODU ANTIMICROBIALS.wiff 2024/07/15 15:28:16 2024 ANTIMICROBIALS.dam R. Tshepho PhD\2024_05_29									Result Table Algorithm Used Instrument Name							BUAN STUDENT ANTIMICROMIBIALS MQ4 QTRAP 6500+ Low Mass
Regression Equation: y = 1.72423e5 x + 6.98631e4 (r = 0.99545) (weighting: 1 / x)
Expected Concentration		Number of Values					Mean Calculated Concentration					% Accuracy						Std. Deviation					%CV
0		1 of 1					0					N/A						N/A					N/A
50		1 of 1					31					62						N/A					N/A
200		1 of 1					216.4					108.2						N/A					N/A
300		1 of 1					305.6					101.9						N/A					N/A
400		1 of 1					397					99.2						N/A					N/A
Analyte Name: Cefquinome T1
Internal Standard: N/A
Data File Acquisition Date Acquisition Method Project	DataBUAN STUDENT MOGODU ANTIMICROBIALS.wiff 2024/07/15 15:28:16 2024 ANTIMICROBIALS.dam R. Tshepho PhD\2024_05_29									Result Table Algorithm Used Instrument Name							BUAN STUDENT ANTIMICROMIBIALS MQ4 QTRAP 6500+ Low Mass
Regression Equation: y = 2096.53096 x + 1839.99876 (r = 0.99417) (weighting: 1 / x)
Expected Concentration		Number of Values					Mean Calculated Concentration					% Accuracy						Std. Deviation					%CV
0		1 of 1					0					N/A						N/A					N/A
12.5		1 of 1					12.4					99.1						N/A					N/A
75		1 of 1					85					113.4						N/A					N/A
100		1 of 1					98.5					98.6						N/A					N/A
Analyte Name: Danofloxacin T1
Internal Standard: N/A
Data File Acquisition Date Acquisition Method Project	DataBUAN STUDENT MOGODU ANTIMICROBIALS.wiff 2024/07/15 15:28:16 2024 ANTIMICROBIALS.dam R. Tshepho PhD\2024_05_29									Result Table Algorithm Used Instrument Name							BUAN STUDENT ANTIMICROMIBIALS MQ4 QTRAP 6500+ Low Mass
Regression Equation: y = 1.65891e5 x + 5.12873e4 (r = 0.99871) (weighting: 1 / x)
Expected Concentration		Number of Values					Mean Calculated Concentration					% Accuracy						Std. Deviation					%CV
0		0 of 1					N/A					N/A						N/A					N/A
50		1 of 1					55.9					111.8						N/A					N/A
200		1 of 1					206.1					103.1						N/A					N/A
300		1 of 1					310.2					103.4						N/A					N/A
400		1 of 1					377.8					94.5						N/A					N/A
Analyte Name: Difloxacin T1
Internal Standard: N/A
Data File Acquisition Date Acquisition Method Project	DataBUAN STUDENT MOGODU ANTIMICROBIALS.wiff 2024/07/15 15:28:16 2024 ANTIMICROBIALS.dam R. Tshepho PhD\2024_05_29									Result Table Algorithm Used Instrument Name							BUAN STUDENT ANTIMICROMIBIALS MQ4 QTRAP 6500+ Low Mass
Regression Equation: y = 3.04975e5 x + 4.15410e5 (r = 0.99524) (weighting: 1 / x)
Expected Concentration		Number of Values					Mean Calculated Concentration					% Accuracy						Std. Deviation					%CV
0		0 of 1					N/A					N/A						N/A					N/A
100		1 of 1					127.2					127.2						N/A					N/A
400		1 of 1					444.2					111.1						N/A					N/A
600		1 of 1					597.5					99.6						N/A					N/A
800		1 of 1					731.1					91.4						N/A					N/A
Analyte Name: Enrofloxacin T1
Internal Standard: N/A
Data File Acquisition Date Acquisition Method Project	DataBUAN STUDENT MOGODU ANTIMICROBIALS.wiff 2024/07/15 15:28:16 2024 ANTIMICROBIALS.dam R. Tshepho PhD\2024_05_29									Result Table Algorithm Used Instrument Name							BUAN STUDENT ANTIMICROMIBIALS MQ4 QTRAP 6500+ Low Mass
Regression Equation: y = 1.77265e5 x + 2.18496e6 (r = 0.99912) (weighting: 1 / x)
Expected Concentration		Number of Values					Mean Calculated Concentration					% Accuracy						Std. Deviation					%CV
0		0 of 1					N/A					N/A						N/A					N/A
25		1 of 1					28.5					114.1						N/A					N/A
100		1 of 1					104.1					104.1						N/A					N/A
150		1 of 1					147.7					98.5						N/A					N/A
200		1 of 1					194.7					97.4						N/A					N/A
Analyte Name: Flumequine T1
Internal Standard: N/A
Data File Acquisition Date Acquisition Method Project	DataBUAN STUDENT MOGODU ANTIMICROBIALS.wiff 2024/07/15 15:28:16 2024 ANTIMICROBIALS.dam R. Tshepho PhD\2024_05_29									Result Table Algorithm Used Instrument Name							BUAN STUDENT ANTIMICROMIBIALS MQ4 QTRAP 6500+ Low Mass
Regression Equation: y = 8.77272e5 x + 1.36915e5 (r = 0.99782) (weighting: 1 / x)
Expected Concentration		Number of Values					Mean Calculated Concentration					% Accuracy						Std. Deviation					%CV
0		0 of 1					N/A					N/A						N/A					N/A
50		1 of 1					59.7					119.3						N/A					N/A
200		1 of 1					201.1					100.6						N/A					N/A
300		1 of 1					314.4					104.8						N/A					N/A
400		1 of 1					374.8					93.7						N/A					N/A
Analyte Name: Ciprofloxacin T1
Internal Standard: N/A
Data File Acquisition Date Acquisition Method Project	DataBUAN STUDENT MOGODU ANTIMICROBIALS.wiff 2024/07/15 15:28:16 2024 ANTIMICROBIALS.dam R. Tshepho PhD\2024_05_29									Result Table Algorithm Used Instrument Name							BUAN STUDENT ANTIMICROMIBIALS MQ4 QTRAP 6500+ Low Mass
Regression Equation: y = 1.40514e5 x + 2.17848e5 (r = 0.99889) (weighting: 1 / x)
Expected Concentration		Number of Values					Mean Calculated Concentration					% Accuracy						Std. Deviation					%CV
0		0 of 1					N/A					N/A						N/A					N/A
25		1 of 1					26.5					106.1						N/A					N/A
100		1 of 1					106.6					106.7						N/A					N/A
150		1 of 1					151.8					101.2						N/A					N/A
200		1 of 1					190					95						N/A					N/A
Analyte Name: Marbofloxacin T1
Internal Standard: N/A
Data File Acquisition Date Acquisition Method Project	DataBUAN STUDENT MOGODU ANTIMICROBIALS.wiff 2024/07/15 15:28:16 2024 ANTIMICROBIALS.dam R. Tshepho PhD\2024_05_29									Result Table Algorithm Used Instrument Name							BUAN STUDENT ANTIMICROMIBIALS MQ4 QTRAP 6500+ Low Mass
Regression Equation: y = 6.56029e4 x + 21624.99101 (r = 0.99869) (weighting: 1 / x)
Expected Concentration		Number of Values					Mean Calculated Concentration					% Accuracy						Std. Deviation					%CV
0		0 of 1					N/A					N/A						N/A					N/A
37.5		1 of 1					42					111.9						N/A					N/A
150		1 of 1					150.2					100.2						N/A					N/A
225		1 of 1					235.9					104.8						N/A					N/A
300		1 of 1					284.4					94.8						N/A					N/A
Analyte Name: Oxolonic acid T1
Internal Standard: N/A
Data File Acquisition Date Acquisition Method Project	DataBUAN STUDENT MOGODU ANTIMICROBIALS.wiff 2024/07/15 15:28:16 2024 ANTIMICROBIALS.dam R. Tshepho PhD\2024_05_29									Result Table Algorithm Used Instrument Name							BUAN STUDENT ANTIMICROMIBIALS MQ4 QTRAP 6500+ Low Mass
Regression Equation: y = 22291.35148 x + 7.02642e4 (r = 0.99848) (weighting: 1 / x)
Expected Concentration		Number of Values					Mean Calculated Concentration					% Accuracy						Std. Deviation					%CV
0		0 of 1					N/A					N/A						N/A					N/A
25		1 of 1					25.3					101.4						N/A					N/A
100		1 of 1					102.1					102.1						N/A					N/A
150		1 of 1					159.8					106.6						N/A					N/A
200		1 of 1					187.7					93.9						N/A					N/A
Analyte Name: Sarafloxacin 1
Internal Standard: N/A
Data File Acquisition Date Acquisition Method Project	DataBUAN STUDENT MOGODU ANTIMICROBIALS.wiff 2024/07/15 15:28:16 2024 ANTIMICROBIALS.dam R. Tshepho PhD\2024_05_29									Result Table Algorithm Used Instrument Name							BUAN STUDENT ANTIMICROMIBIALS MQ4 QTRAP 6500+ Low Mass
Regression Equation: y = 6.91601e4 x + 5.01178e5 (r = 0.99621) (weighting: 1 / x)
Expected Concentration		Number of Values					Mean Calculated Concentration					% Accuracy						Std. Deviation					%CV
0		0 of 1					N/A					N/A						N/A					N/A
25		1 of 1					30.1					120.4						N/A					N/A
100		1 of 1					97.8					97.8						N/A					N/A
150		1 of 1					163.4					108.9						N/A					N/A
200		1 of 1					183.6					91.8						N/A					N/A
Analyte Name: Sulfamerazine T1
Internal Standard: N/A
Data File Acquisition Date Acquisition Method Project	DataBUAN STUDENT MOGODU ANTIMICROBIALS.wiff 2024/07/15 15:28:16 2024 ANTIMICROBIALS.dam R. Tshepho PhD\2024_05_29									Result Table Algorithm Used Instrument Name							BUAN STUDENT ANTIMICROMIBIALS MQ4 QTRAP 6500+ Low Mass
Regression Equation: y = 24737.58103 x + 12262.08037 (r = 0.99853) (weighting: 1 / x)
Expected Concentration		Number of Values					Mean Calculated Concentration					% Accuracy						Std. Deviation					%CV
0		1 of 1					0					N/A						N/A					N/A
35		1 of 1					28.7					82.1						N/A					N/A
100		1 of 1					105.1					105.1						N/A					N/A
150		1 of 1					152.5					101.7						N/A					N/A
200		1 of 1					198.7					99.3						N/A					N/A
Analyte Name: Sulfamethazine T1
Internal Standard: N/A
Data File Acquisition Date Acquisition Method Project	DataBUAN STUDENT MOGODU ANTIMICROBIALS.wiff 2024/07/15 15:28:16 2024 ANTIMICROBIALS.dam R. Tshepho PhD\2024_05_29									Result Table Algorithm Used Instrument Name							BUAN STUDENT ANTIMICROMIBIALS MQ4 QTRAP 6500+ Low Mass
Regression Equation: y = 8.75029e4 x + 1.72012e6 (r = 0.99448) (weighting: 1 / x)
Expected Concentration		Number of Values					Mean Calculated Concentration					% Accuracy						Std. Deviation					%CV
0		1 of 1					0					N/A						N/A					N/A
25		1 of 1					15.2					60.7						N/A					N/A
100		1 of 1					102.1					102.1						N/A					N/A
150		1 of 1					163.5					109						N/A					N/A
200		1 of 1					194.1					97.1						N/A					N/A
Analyte Name: Sulfamonomethoxine T1
Internal Standard: N/A
Data File Acquisition Date Acquisition Method Project	DataBUAN STUDENT MOGODU ANTIMICROBIALS.wiff 2024/07/15 15:28:16 2024 ANTIMICROBIALS.dam R. Tshepho PhD\2024_05_29									Result Table Algorithm Used Instrument Name							BUAN STUDENT ANTIMICROMIBIALS MQ4 QTRAP 6500+ Low Mass
Regression Equation: y = 7.41227e4 x + 8993.05196 (r = 0.99822) (weighting: 1 / x)
Expected Concentration		Number of Values					Mean Calculated Concentration					% Accuracy						Std. Deviation					%CV
0		0 of 1					N/A					N/A						N/A					N/A
25		1 of 1					27.8					111.1						N/A					N/A
100		1 of 1					102.1					102.1						N/A					N/A
150		1 of 1					158.4					105.6						N/A					N/A
200		1 of 1					186.7					93.4						N/A					N/A
Analyte Name: Sulfapyridine T1
Internal Standard: N/A
Data File Acquisition Date Acquisition Method Project	DataBUAN STUDENT MOGODU ANTIMICROBIALS.wiff 2024/07/15 15:28:16 2024 ANTIMICROBIALS.dam R. Tshepho PhD\2024_05_29									Result Table Algorithm Used Instrument Name							BUAN STUDENT ANTIMICROMIBIALS MQ4 QTRAP 6500+ Low Mass
Regression Equation: y = 4.67604e4 x + 18099.34402 (r = 0.99933) (weighting: 1 / x)
Expected Concentration		Number of Values					Mean Calculated Concentration					% Accuracy						Std. Deviation					%CV
0		0 of 1					N/A					N/A						N/A					N/A
25		1 of 1					26					104.2						N/A					N/A
100		1 of 1					104.6					104.6						N/A					N/A
150		1 of 1					152.5					101.7						N/A					N/A
200		1 of 1					191.8					95.9						N/A					N/A
Expected Concentration		Number of Values					Mean Calculated Concentration					% Accuracy						Std. Deviation					%CV
0		0 of 5					N/A					N/A						N/A					N/A
5		N/A					N/A					N/A						N/A					N/A
12.5		N/A					N/A					N/A						N/A					N/A
20		N/A					N/A					N/A						N/A					N/A
25		N/A					N/A					N/A						N/A					N/A
30		N/A					N/A					N/A						N/A					N/A
35		N/A					N/A					N/A						N/A					N/A
37.5		N/A					N/A					N/A						N/A					N/A
40		N/A					N/A					N/A						N/A					N/A
50		N/A					N/A					N/A						N/A					N/A
62.5		N/A					N/A					N/A						N/A					N/A
75		N/A					N/A					N/A						N/A					N/A
100		N/A					N/A					N/A						N/A					N/A
150		N/A					N/A					N/A						N/A					N/A
200		N/A					N/A					N/A						N/A					N/A
225		N/A					N/A					N/A						N/A					N/A
300		N/A					N/A					N/A						N/A					N/A
400		N/A					N/A					N/A						N/A					N/A
450		N/A					N/A					N/A						N/A					N/A
600		N/A					N/A					N/A						N/A					N/A
800		N/A					N/A					N/A						N/A					N/A
Data File Acquisition Date Acquisition Method Project	DataBUAN STUDENT MOGODU ANTIMICROBIALS.wiff 2024/07/15 15:28:16 2024 ANTIMICROBIALS.dam R. Tshepho PhD\2024_05_29									Result Table Algorithm Used Instrument Name							BUAN STUDENT ANTIMICROMIBIALS MQ4 QTRAP 6500+ Low Mass
Regression Equation: y = 6.58725e4 x + 9.15018e4 (r = 0.99751) (weighting: 1 / x)
Expected Concentration		Number of Values					Mean Calculated Concentration					% Accuracy						Std. Deviation					%CV
0		0 of 1					N/A					N/A						N/A					N/A
25		1 of 1					26.8					107.3						N/A					N/A
100		1 of 1					101.8					101.8						N/A					N/A
150		1 of 1					162.1					108						N/A					N/A
200		1 of 1					184.3					92.1						N/A					N/A
Analyte Name: Sulfathiazole T1
Internal Standard: N/A
Data File Acquisition Date Acquisition Method Project	DataBUAN STUDENT MOGODU ANTIMICROBIALS.wiff 2024/07/15 15:28:16 2024 ANTIMICROBIALS.dam R. Tshepho PhD\2024_05_29									Result Table Algorithm Used Instrument Name							BUAN STUDENT ANTIMICROMIBIALS MQ4 QTRAP 6500+ Low Mass
Regression Equation: y = 4.52700e4 x + 24609.11835 (r = 0.99667) (weighting: 1 / x)
Expected Concentration		Number of Values					Mean Calculated Concentration					% Accuracy						Std. Deviation					%CV
0		0 of 1					N/A					N/A						N/A					N/A
25		1 of 1					27.7					110.7						N/A					N/A
100		1 of 1					110.6					110.6						N/A					N/A
150		1 of 1					154.7					103.1						N/A					N/A
200		1 of 1					182					91						N/A					N/A
Analyte Name: Sulfadimethoxine T1
Internal Standard: N/A
Data File Acquisition Date Acquisition Method Project	DataBUAN STUDENT MOGODU ANTIMICROBIALS.wiff 2024/07/15 15:28:16 2024 ANTIMICROBIALS.dam R. Tshepho PhD\2024_05_29									Result Table Algorithm Used Instrument Name							BUAN STUDENT ANTIMICROMIBIALS MQ4 QTRAP 6500+ Low Mass
Regression Equation: y = 7.62654e4 x + 20718.84322 (r = 0.99793) (weighting: 1 / x)
Expected Concentration		Number of Values					Mean Calculated Concentration					% Accuracy						Std. Deviation					%CV
0		0 of 1					N/A					N/A						N/A					N/A
25		1 of 1					27.5					110.1						N/A					N/A
100		1 of 1					110.3					110.3						N/A					N/A
150		1 of 1					148.5					99						N/A					N/A
200		1 of 1					188.6					94.3						N/A					N/A
Analyte Name: Sulfachloropyridazine T1
Internal Standard: N/A
Data File Acquisition Date Acquisition Method Project	DataBUAN STUDENT MOGODU ANTIMICROBIALS.wiff 2024/07/15 15:28:16 2024 ANTIMICROBIALS.dam R. Tshepho PhD\2024_05_29									Result Table Algorithm Used Instrument Name							BUAN STUDENT ANTIMICROMIBIALS MQ4 QTRAP 6500+ Low Mass
Regression Equation: y = 5.29197e4 x + 26672.21550 (r = 0.99870) (weighting: 1 / x)
Expected Concentration		Number of Values					Mean Calculated Concentration					% Accuracy						Std. Deviation					%CV
0		0 of 1					N/A					N/A						N/A					N/A
25		1 of 1					25.3					101.1						N/A					N/A
100		1 of 1					106.4					106.4						N/A					N/A
150		1 of 1					154.9					103.3						N/A					N/A
200		1 of 1					188.4					94.2						N/A					N/A
Analyte Name: Sulfadiazine T1
Internal Standard: N/A
Data File Acquisition Date Acquisition Method Project	DataBUAN STUDENT MOGODU ANTIMICROBIALS.wiff 2024/07/15 15:28:16 2024 ANTIMICROBIALS.dam R. Tshepho PhD\2024_05_29									Result Table Algorithm Used Instrument Name							BUAN STUDENT ANTIMICROMIBIALS MQ4 QTRAP 6500+ Low Mass
Regression Equation: y = 3.75088e4 x + 16000.04585 (r = 0.99683) (weighting: 1 / x)
Expected Concentration		Number of Values					Mean Calculated Concentration					% Accuracy						Std. Deviation					%CV
0		0 of 1					N/A					N/A						N/A					N/A
25		1 of 1					31.1					124.4						N/A					N/A
100		1 of 1					103.4					103.4						N/A					N/A
150		1 of 1					155.9					103.9						N/A					N/A
200		1 of 1					184.6					92.3						N/A					N/A
Analyte Name: Sulfamethoxypyridazine T1
Internal Standard: N/A
Data File Acquisition Date Acquisition Method Project	DataBUAN STUDENT MOGODU ANTIMICROBIALS.wiff 2024/07/15 15:28:16 2024 ANTIMICROBIALS.dam R. Tshepho PhD\2024_05_29									Result Table Algorithm Used Instrument Name							BUAN STUDENT ANTIMICROMIBIALS MQ4 QTRAP 6500+ Low Mass
Regression Equation: y = 4.29692e4 x + 13856.76366 (r = 0.99951) (weighting: 1 / x)
Expected Concentration		Number of Values					Mean Calculated Concentration					% Accuracy						Std. Deviation					%CV
0		0 of 1					N/A					N/A						N/A					N/A
25		1 of 1					26.3					105.1						N/A					N/A
100		1 of 1					99.8					99.8						N/A					N/A
150		1 of 1					155.3					103.6						N/A					N/A
200		1 of 1					193.6					96.8						N/A					N/A
Analyte Name: Trimethoprim T1
Internal Standard: N/A
Data File Acquisition Date Acquisition Method Project	DataBUAN STUDENT MOGODU ANTIMICROBIALS.wiff 2024/07/15 15:28:16 2024 ANTIMICROBIALS.dam R. Tshepho PhD\2024_05_29									Result Table Algorithm Used Instrument Name							BUAN STUDENT ANTIMICROMIBIALS MQ4 QTRAP 6500+ Low Mass
Regression Equation: y = 5.34891e4 x + 1.75519e5 (r = 0.99778) (weighting: 1 / x)
Expected Concentration		Number of Values					Mean Calculated Concentration					% Accuracy						Std. Deviation					%CV
0		0 of 1					N/A					N/A						N/A					N/A
25		1 of 1					27.5					110						N/A					N/A
100		1 of 1					106.4					106.4						N/A					N/A
150		1 of 1					156.5					104.3						N/A					N/A
200		1 of 1					184.6					92.3						N/A					N/A
Analyte Name: Sulfisoxasole T1
Internal Standard: N/A
Data File Acquisition Date Acquisition Method Project	DataBUAN STUDENT MOGODU ANTIMICROBIALS.wiff 2024/07/15 15:28:16 2024 ANTIMICROBIALS.dam R. Tshepho PhD\2024_05_29									Result Table Algorithm Used Instrument Name							BUAN STUDENT ANTIMICROMIBIALS MQ4 QTRAP 6500+ Low Mass
Regression Equation: y = 7.41317e4 x + 9218.10692 (r = 0.99936) (weighting: 1 / x)
Expected Concentration		Number of Values					Mean Calculated Concentration					% Accuracy						Std. Deviation					%CV
0		0 of 1					N/A					N/A						N/A					N/A
25		1 of 1					26.8					107						N/A					N/A
100		1 of 1					100.5					100.5						N/A					N/A
150		1 of 1					155.4					103.6						N/A					N/A
200		1 of 1					192.3					96.2						N/A					N/A
Analyte Name: Sulfamethizole T1
Internal Standard: N/A
Data File Acquisition Date Acquisition Method Project	DataBUAN STUDENT MOGODU ANTIMICROBIALS.wiff 2024/07/15 15:28:16 2024 ANTIMICROBIALS.dam R. Tshepho PhD\2024_05_29									Result Table Algorithm Used Instrument Name							BUAN STUDENT ANTIMICROMIBIALS MQ4 QTRAP 6500+ Low Mass
Regression Equation: y = 4.03456e4 x + 14866.74117 (r = 0.99878) (weighting: 1 / x)
Expected Concentration		Number of Values					Mean Calculated Concentration					% Accuracy						Std. Deviation					%CV
0		0 of 1					N/A					N/A						N/A					N/A
25		1 of 1					27.1					108.5						N/A					N/A
100		1 of 1					108					108.1						N/A					N/A
150		1 of 1					147.4					98.3						N/A					N/A
200		1 of 1					192.4					96.2						N/A					N/A
Analyte Name: Amoxicillin T1
Internal Standard: N/A
Data File Acquisition Date Acquisition Method Project	DataBUAN STUDENT MOGODU ANTIMICROBIALS.wiff 2024/07/15 15:28:16 2024 ANTIMICROBIALS.dam R. Tshepho PhD\2024_05_29									Result Table Algorithm Used Instrument Name							BUAN STUDENT ANTIMICROMIBIALS MQ4 QTRAP 6500+ Low Mass
Regression Equation: y = 16660.72417 x + 4103.73672 (r = 0.99659) (weighting: 1 / x)
Expected Concentration		Number of Values					Mean Calculated Concentration					% Accuracy						Std. Deviation					%CV
0		1 of 1					0					N/A						N/A					N/A
[truncated: 94 more rows]

## Sheet: QC
		Antibiotics	Regression equation	R2
		Doxycycline T1	y = 6.28872e5 x + 24021.06694	0.99851
		Penicillin G T1	y = 1296.03567 x + 690.00115	0.99818
		Oxaciliin T1	y = 6869.60587 x + 9817.00320	0.99296
		Dicloxacillin T1	y = 3.26202e4 x + 2990.29256	0.9986
		Cefapirin T1	y = 20660.96361 x + 1840.02631	0.99693
		Cefalexin T1	y = 1.72423e5 x + 6.98631e4	0.99545
		Cefquinome T1	y = 2096.53096 x + 1839.99876	0.99417
		Danofloxacin T1	y = 1.65891e5 x + 5.12873e4	0.99871
		Difloxacin T1	y = 3.04975e5 x + 4.15410e5	0.99524
		Enrofloxacin T1	y = 1.77265e5 x + 2.18496e6	0.99912
		Flumequine T1	y = 8.77272e5 x + 1.36915e5	0.99782
		Ciprofloxacin T1	y = 1.40514e5 x + 2.17848e5	0.99889
		Marbofloxacin T1	y = 6.56029e4 x + 21624.99101	0.99869
		Oxolonic acid T1	y = 22291.35148 x + 7.02642e4	0.99848
		Sarafloxacin 1	y = 6.91601e4 x + 5.01178e5	0.99621
		Sulfamerazine T1	y = 24737.58103 x + 12262.08037	0.99853
		Sulfamethazine T1	y = 8.75029e4 x + 1.72012e6	0.99448
		Sulfamonomethoxine T1	y = 7.41227e4 x + 8993.05196	0.99822
		Sulfapyridine T1	y = 4.67604e4 x + 18099.34402	0.99933
		Sulfathiazole T1	y = 4.52700e4 x + 24609.11835	0.99667
		Sulfadimethoxine T1	y = 7.62654e4 x + 20718.84322	0.99793
		Sulfachloropyridazine T1	y = 5.29197e4 x + 26672.21550	0.9987
		Sulfadiazine T1	y = 3.75088e4 x + 16000.04585	0.99683
		Sulfamethoxypyridazine T1	y = 4.29692e4 x + 13856.76366	0.99951
		Trimethoprim T1	y = 5.34891e4 x + 1.75519e5	0.99778
		Sulfisoxasole T1	y = 7.41317e4 x + 9218.10692	0.99936
		Sulfamethizole T1	y = 4.03456e4 x + 14866.74117	0.99878
		Amoxicillin T1	y = 16660.72417 x + 4103.73672	0.99659
		Erythromycin T1	y = 3.25236e4 x + 5060.18980	0.9987
		Tilmicosin T1	y = 8.02329e5 x + 1.21339e5	0.99563
		Tylosin T1	y = 10773.80492 x + 4737.68830	0.99515
		Tulathromycin T1	y = 4.03459e5 x + 1.19390e5	0.99557
		Gamithromycin T1	y = 23116.95561 x + 9891.33980	0.99063
		Lincomycin T1	y = 1.83532e6 x + 3.35693e5	0.99059
		Pirlimycin T1	y = 9.29887e4 x + 21804.33005	0.99838
		Tildipirosin T1	y = 1.26884e5 x + 6.98173e4	0.99372

## Sheet: Recovery
									Spiked
	Antibiotics	%Recover value ± %RSD	EU MRL in muscle (µg/kg)					Antibiotics	QC1 Recovery	95.29 ± 12.1	Average	RSD%	Recovery
	Doxycycline T1	83.42 ± 14.20	100					Doxycycline T1	75.04	91.79	83.415	14.1989	83.42 ± 14.20
	Penicillin G T1	114.80 ± 5.02	15					Ampicillin T1	107.05	100.63	103.84	4.37175	103.84 ± 4.37
	Oxaciliin T1	105.275 ± 7.75	N/A					Penicillin G T1	118.87	110.72	114.795	5.02018	114.80 ± 5.02
	Dicloxacillin T1	102.525 ± 14.1	300					Penicillin V T1	108.39	110.83	109.61	1.57407	109.80 ± 1.57
	Cefapirin T1	73.22 ± 39.2	50					Oxaciliin T1	111.05	99.5	105.275	7.75786	105.275 ± 7.75
	Cefalexin T1	85.96 ± 11.9	200					Cloxacillin T1	92.26	112.79	102.525	14.1594	102.525 ± 14.1
	Cefquinome T1	72.43 ± 3.88	50					Dicloxacillin T1	52.92	93.52	73.22	39.2086	73.22 ± 39.2
	Danofloxacin T1	107.81 ± 11.6	200					Cefapirin T1	93.22	78.7	85.96	11.9441	85.96 ± 11.9
	Difloxacin T1	94.43 ± 9.71	400					Cefalexin T1	74.42	70.44	72.43	3.88552	72.43 ± 3.88
	Enrofloxacin T1	105.69 ± 2.97	100					Cefquinome T1	121.14	98.33	109.735	14.6982	109.735 ± 14.6
	Flumequine T1	76.52 ± 4.41	200					Danofloxacin T1	98.91	116.71	107.81	11.6747	107.81 ± 11.6
	Ciprofloxacin T1	109.98 ± 4.02	100					Difloxacin T1	87.94	100.92	94.43	9.71963	94.43 ± 9.71
	Marbofloxacin T1	107.315 ± 0.79	150					Enrofloxacin T1	107.91	103.47	105.69	2.97053	105.69 ± 2.97
	Oxolonic acid T1	107.80 ± 0.30	N/A					Flumequine T1	78.91	74.13	76.52	4.41711	76.52 ± 4.41
	Sarafloxacin 1	93.765 ± 1.34	N/A					Ciprofloxacin T1	106.85	113.11	109.98	4.02481	109.98 ± 4.02
	Sulfamerazine T1	105.05 ± 0.05	100					Marbofloxacin T1	106.71	107.92	107.315	0.797278	107.315 ± 0.79
	Sulfamethazine T1	92.97 ± 15.6	100					Oxolonic acid T1	107.27	107.73	107.5	0.302576	107.80 ± 0.30
	Sulfamonomethoxine T1	107.415 ± 0.30	100					Sarafloxacin 1	94.66	92.87	93.765	1.34989	93.765 ± 1.34
	Sulfapyridine T1	105.64 ± 5.95	100					Sulfamerazine T1	105.01	105.09	105.05	0.0538492	105.05 ± 0.05
	Sulfathiazole T1	90.39 ± 3.37	100					Sulfamethazine T1	82.69	103.25	92.97	15.6374	92.97 ± 15.6
	Sulfadimethoxine T1	86.255 ± 19.5	100					Sulfamonomethoxine T1	107.18	107.65	107.415	0.309398	107.415 ± 0.30
	Sulfachloropyridazine T1	86.835 ± 2.22	100					Sulfapyridine T1	110.09	101.19	105.64	5.95726	105.64 ± 5.95
	Sulfadiazine T1	102.155 ± 1.51	100					Sulfaquinoxaline T1	92.55	88.23	90.39	3.37947	90.39 ± 3.37
	Sulfamethoxypyridazine T1	102.97 ± 6.42	100					Sulfathiazole T1	98.18	74.33	86.255	19.5519	86.255 ± 19.5
	Trimethoprim T1	97.72 ± 5.02	100					Sulfadimethoxine T1	88.2	85.47	86.835	2.22307	86.835 ± 2.22
	Sulfisoxasole T1	93.385 ± 7.80	100					Sulfachloropyridazine T1	101.06	103.25	102.155	1.5159	102.155 ± 1.51
	Sulfamethizole T1	91.37 ± 5.47	100					Sulfadiazine T1	98.29	107.65	102.97	6.42762	102.97 ± 6.42
	Amoxicillin T1	92.245 ± 5.51	50					Sulfamethoxypyridazine T1	94.25	101.19	97.72	5.02182	97.72 ± 5.02
	Erythromycin T1	98.67 ± 4.80	200					Trimethoprim T1	98.54	88.23	93.385	7.80668	93.385 ± 7.80
	Tilmicosin T1	92.45 ± 20.6	75					Sulfisoxasole T1	94.91	87.83	91.37	5.47917	91.37 ± 5.47
	Tylosin T1	106.665 ± 1.51	100					Sulfamethizole T1	88.65	95.84	92.245	5.51152	92.245 ± 5.51
	Tulathromycin T1	93.535 ± 0.41	100					Erythromycin T1	95.32	102.02	98.67	4.80148	98.67 ± 4.80
	Gamithromycin T1	96.24 ± 2.23	20					Tilmicosin T1	78.98	105.92	92.45	20.6051	92.45 ± 20.6
	Lincomycin T1	101.685 ± 0.22	100					Tylosin T1	107.81	105.52	106.665	1.51809	106.665 ± 1.51
	Pirlimycin T1	101.455 ± 5.13	100					Spiramycin T1	68.62	82.2	75.41	12.7337	75.41 ± 12.7
	Tildipirosin T1	95.29 ± 12.1	N/A					Tulathromycin T1	93.26	93.81	93.535	0.41579	93.535 ± 0.41
								Gamithromycin T1	94.72	97.76	96.24	2.23359	96.24 ± 2.23
								Lincomycin T1	101.85	101.52	101.685	0.229479	101.685 ± 0.22
								Pirlimycin T1	97.77	105.14	101.455	5.13664	101.455 ± 5.13
								Tildipirosin T1	103.45	87.13	95.29	12.1104	95.29 ± 12.1

## Sheet: Antibiotics
	Antibiotics	S1	S2	S3	S4	S5	S6	S7	S8	S9	S10	S11	S12	S13	S14	S15	S16	S17	S18	S19	S20	S21	S22	S23	S24	S25	S26	S27	S28	S29	S30
	Doxycycline T1	0.3	0.1	0.1	0.1	0.1	0.1	0.1	0.1	0.3	0.3	0.3	0.3	0.3	0.1	0.1	0.1	0.1	0.3	0.3	0.3	0.3	0.1	0.1	0.1	0.1	0.1	0.1	0.1	0.1	0.1
	Ampicillin T1	< 0	< 0	< 0	36.9	< 0	32.4	< 0	< 0	< 0	< 0	< 0	< 0	< 0	< 0	< 0	< 0	< 0	< 0	< 0	< 0	< 0	< 0	< 0	< 0	< 0	< 0	< 0	< 0	< 0	< 0
	Penicillin G T1	0.4	1.4	0.9	1.2	1.4	1.4	1.4	1.4	0.4	0.4	0.4	0.4	0.4	1.4	1.4	1.4	1.4	0.4	0.4	0.4	0.4	1.4	1.4	1.4	1.4	1.4	1.4	1.4	1.4	1.4
	Penicillin V T1	< 0	1.2	< 0	< 0	1.2	1.2	1.2	1.2	< 0	< 0	< 0	< 0	< 0	1.2	1.2	1.2	1.2	< 0	< 0	< 0	< 0	1.2	1.2	1.2	1.2	1.2	1.2	1.2	1.2	1.2
	Oxaciliin T1	0.4	0.2	0.6	0.2	0.2	0.2	0.2	0.2	0.4	0.4	0.4	0.4	0.4	0.2	0.2	0.2	0.2	0.4	0.4	0.4	0.4	0.2	0.2	0.2	0.2	0.2	0.2	0.2	0.2	0.2
	Cloxacillin T1	0.6	0.6	0.1	0.6	0.6	0.6	0.6	0.6	0.6	0.6	0.6	0.6	0.6	0.6	0.6	0.6	0.6	0.6	0.6	0.6	0.6	0.6	0.6	0.6	0.6	0.6	0.6	0.6	0.6	0.6
	Dicloxacillin T1	0.1	0.2	0.2	0.1	0.2	0.2	0.2	0.2	0.1	0.1	0.1	0.1	0.1	0.2	0.2	0.2	0.2	0.1	0.1	0.1	0.1	0.2	0.2	0.2	0.2	0.2	0.2	0.2	0.2	0.2
	Nafcillin T1	< 0	< 0	< 0	< 0	< 0	< 0	< 0	< 0	< 0	< 0	< 0	< 0	< 0	< 0	< 0	< 0	< 0	< 0	< 0	< 0	< 0	< 0	< 0	< 0	< 0	< 0	< 0	< 0	< 0	< 0
	Cefalonium T1	< 0	2.8	9.1	4.9	2.8	2.8	0.9	2.8	< 0	< 0	< 0	< 0	< 0	2.8	2.8	2.8	2.8	< 0	< 0	< 0	< 0	2.8	2.8	2.8	2.8	2.8	2.8	2.8	2.8	2.8
	Cefapirin T1	0	0.1	0	0.1	0.1	0.1	0.1	0.1	0	0	0	0	0	0.1	0.1	0.1	0.1	0	0	0	0	0.1	0.1	0.1	0.1	0.1	0.1	0.1	0.1	0.1
	Cefalexin T1	< 0	< 0	0	0	< 0	< 0	< 0	< 0	< 0	< 0	< 0	< 0	< 0	< 0	< 0	< 0	< 0	< 0	< 0	< 0	< 0	< 0	< 0	< 0	< 0	< 0	< 0	< 0	< 0	< 0
	Cefquinome T1	0	0.2	N/A	< 0	0.2	0.2	0.2	0.2	0	0	0	0	0	0.2	0.2	0.2	0.2	0	0	0	0	0.2	0.2	0.2	0.2	0.2	0.2	0.2	0.2	0.2
	Danofloxacin T1	0.2	0.2	< 0	0.1	0.2	0.2	0.2	0.2	0.2	0.2	0.2	0.2	0.2	0.2	0.2	0.2	0.2	0.2	0.2	0.2	0.2	0.2	0.2	0.2	0.2	0.2	0.2	0.2	0.2	0.2
	Difloxacin T1	0.2	0.3	< 0	0.2	0.3	0.3	0.3	0.3	0.2	0.2	0.2	0.2	0.2	0.3	0.3	0.3	0.3	0.1	0.1	0.1	0.1	0.3	0.3	0.3	0.3	0.3	0.3	0.3	0.3	0.3
	Enrofloxacin T1	0.2	< 0	< 0	0.2	< 0	< 0	< 0	< 0	0.2	0.2	0.2	0.2	17	< 0	< 0	< 0	24.7	0.2	0.2	0.2	0.2	< 0	< 0	< 0	< 0	< 0	< 0	< 0	< 0	< 0
	Flumequine T1	< 0	0.2	0.2	0.2	0.2	0.2	0.2	0.2	< 0	< 0	< 0	< 0	< 0	0.2	0.2	0.2	0.2	< 0	< 0	< 0	< 0	0.2	0.2	0.2	0.2	0.2	0.2	0.2	0.2	0.2
	Ciprofloxacin T1	< 0	< 0	< 0	0.2	< 0	< 0	< 0	< 0	< 0	< 0	< 0	< 0	< 0	< 0	< 0	< 0	< 0	< 0	< 0	< 0	< 0	< 0	< 0	< 0	< 0	< 0	< 0	< 0	< 0	< 0
	Marbofloxacin T1	< 0	0.1	< 0	< 0	0.1	0.1	0.1	0.1	< 0	< 0	< 0	< 0	< 0	0.1	0.1	0.1	0.1	< 0	< 0	< 0	< 0	0.1	0.1	0.1	0.1	0.1	0.1	0.1	0.1	0.1
	Oxolonic acid T1	< 0	< 0	< 0	0.1	< 0	< 0	< 0	< 0	< 0	< 0	< 0	< 0	< 0	< 0	< 0	< 0	< 0	< 0	< 0	< 0	< 0	< 0	< 0	< 0	< 0	< 0	< 0	< 0	< 0	< 0
	Sarafloxacin 1	0.1	< 0	< 0	< 0	< 0	< 0	< 0	< 0	0.1	0.1	0.1	0.1	0.1	< 0	< 0	< 0	< 0	0.1	0.1	0.1	0.1	< 0	< 0	< 0	< 0	< 0	< 0	< 0	< 0	< 0
	Sulfamerazine T1	< 0	< 0	< 0	0	< 0	< 0	< 0	< 0	< 0	< 0	< 0	< 0	< 0	< 0	< 0	< 0	< 0	< 0	< 0	< 0	< 0	< 0	< 0	< 0	< 0	< 0	< 0	< 0	< 0	< 0
	Sulfamethazine T1	0.1	< 0	< 0	< 0	< 0	< 0	< 0	< 0	0.1	0.1	0.1	0.1	0.1	< 0	< 0	< 0	< 0	0.1	0.1	0.1	0.1	< 0	< 0	9.2	9.2	9.2	9.2	23.8	9.2	9.2
	Sulfamonomethoxine T1	0.2	0.1	0.1	0	0.1	0.1	0.1	0.1	0.2	0.2	0.2	0.2	0.2	0.1	0.1	0.1	0.1	0.2	0.2	0.2	0.2	0.1	0.1	0.1	0.1	0.1	0.1	0.1	0.1	0.1
	Sulfapyridine T1	0.1	< 0	< 0	0	< 0	< 0	< 0	< 0	0.1	0.1	0.1	0.1	0.1	< 0	< 0	< 0	< 0	0.1	0.1	0.1	0.1	< 0	< 0	< 0	< 0	< 0	< 0	< 0	< 0	< 0
	Sulfaquinoxaline T1	0	< 0	< 0	< 0	< 0	< 0	< 0	< 0	0	0	0	0	0	< 0	< 0	< 0	< 0	0	0	0	0	< 0	< 0	< 0	< 0	< 0	< 0	< 0	< 0	< 0
	Sulfathiazole T1	< 0	< 0	< 0	< 0	< 0	< 0	< 0	< 0	< 0	< 0	< 0	< 0	< 0	< 0	< 0	< 0	< 0	< 0	< 0	< 0	< 0	< 0	< 0	< 0	< 0	< 0	< 0	< 0	< 0	< 0
	Sulfadimethoxine T1	0	< 0	0	< 0	< 0	< 0	< 0	< 0	0	0	0	0	0	< 0	< 0	< 0	< 0	0	0	0	0	< 0	< 0	< 0	< 0	< 0	< 0	< 0	< 0	< 0
	Sulfachloropyridazine T1	0.2	0.1	0.2	< 0	0.1	0.1	0.1	0.1	0.2	0.2	0.2	0.2	0.2	0.1	0.1	0.1	0.1	0.2	0.2	0.2	0.2	0.1	0.1	0.1	0.1	0.1	0.1	0.1	0.1	0.1
	Sulfadiazine T1	< 0	0	< 0	< 0	0	0	0	0	< 0	< 0	< 0	< 0	< 0	0	0	0	0	< 0	< 0	< 0	< 0	0	0	0	0	0	0	0	0	0
	Sulfamethoxypyridazine T1	< 0	0	0.1	< 0	0	0	0	0	< 0	< 0	< 0	< 0	< 0	0	0	0	0	< 0	< 0	< 0	< 0	0	0	0	0	0	0	0	0	0
	Trimethoprim T1	0	< 0	< 0	< 0	< 0	< 0	< 0	< 0	0	0	0	0	0	< 0	< 0	< 0	< 0	0	0	0	0	< 0	< 0	< 0	< 0	< 0	< 0	< 0	< 0	< 0
	Sulfisoxasole T1	0.3	< 0	< 0	< 0	< 0	< 0	< 0	< 0	0.3	0.3	0.3	0.3	0.3	< 0	< 0	< 0	< 0	0.3	0.3	0.3	0.3	< 0	< 0	< 0	< 0	< 0	< 0	< 0	< 0	< 0
	Sulfamethizole T1	< 0	0.1	< 0	0.1	0.1	0.1	0.1	0.1	< 0	< 0	< 0	< 0	< 0	0.1	0.1	0.1	0.1	< 0	< 0	< 0	< 0	0.1	0.1	0.1	0.1	0.1	0.1	0.1	0.1	0.1
	Amoxicillin T1	0	< 0	< 0	< 0	< 0	< 0	< 0	< 0	0	0	0	0	0	< 0	< 0	< 0	< 0	0	0	0	0	< 0	< 0	< 0	< 0	< 0	< 0	< 0	< 0	< 0
	Erythromycin T1	0.1	0	0	< 0	0	0	0	0	0.1	0.1	0.1	0.1	0.1	0	0	0	0	0.1	0.1	0.1	0.1	0	0	0	0	0	0	0	0	0
	Tilmicosin T1	< 0	0.1	0.1	0	0.1	0.1	0.1	0.1	< 0	< 0	< 0	< 0	< 0	0.1	0.1	0.1	0.1	< 0	< 0	< 0	< 0	0.1	0.1	0.1	0.1	0.1	0.1	0.1	0.1	0.1
	Tylosin T1	0	< 0	0.1	< 0	< 0	< 0	< 0	< 0	0	0	0	0	0	< 0	< 0	< 0	< 0	0	0	0	0	< 0	< 0	< 0	< 0	< 0	< 0	< 0	< 0	< 0
	Tulathromycin T1	< 0	< 0	< 0	N/A	< 0	< 0	< 0	< 0	< 0	< 0	< 0	< 0	< 0	< 0	< 0	< 0	< 0	< 0	< 0	< 0	< 0	< 0	< 0	< 0	< 0	< 0	< 0	< 0	< 0	< 0
	Gamithromycin T1	< 0	< 0	0	0.1	< 0	< 0	< 0	< 0	< 0	< 0	< 0	< 0	< 0	< 0	< 0	< 0	< 0	< 0	< 0	< 0	< 0	< 0	< 0	< 0	< 0	< 0	< 0	< 0	< 0	< 0
	Lincomycin T1	< 0	< 0	< 0	< 0	< 0	< 0	< 0	< 0	< 0	< 0	< 0	< 0	< 0	< 0	< 0	< 0	< 0	< 0	< 0	< 0	< 0	< 0	< 0	< 0	< 0	< 0	< 0	< 0	< 0	< 0
	Pirlimycin T1	0.1	< 0	< 0	< 0	< 0	< 0	< 0	< 0	0.1	0.1	0.1	0.1	0.1	< 0	< 0	< 0	< 0	0.1	0.1	0.1	0.1	< 0	< 0	< 0	< 0	< 0	< 0	< 0	< 0	< 0
	Tildipirosin T1	< 0	< 0	< 0	< 0	< 0	< 0	< 0	< 0	0	0	0	0	0	< 0	< 0	< 0	< 0	0	0	0	0	< 0	< 0	< 0	< 0	< 0	< 0	< 0	< 0	< 0
